# Supplementary material for: Preparation and Evaluation of 6-Gingerol Derivatives as Novel Antioxidants and Antiplatelet Agents
Source: MDPI journal article supplement (doi:10.3390/antiox12030744), 2023-03-17
Supplement: s1 [file s1]

## Supplementary Materials to

# Preparation and Evaluation of 6-Gingerol Derivatives as Novel Antioxidants and Antiplatelet Agents

Sara H. H. Ahmed <sup>1,†,‡</sup>, Tímea Gonda <sup>1,†</sup>, Orinamhe G. Agbadua <sup>1</sup>, Gábor Girst <sup>1</sup>, Róbert Berkecz <sup>2</sup>, Norbert Kúsz <sup>1</sup>, Meng-Chun Tsai <sup>3</sup>, Chin-Chung Wu <sup>3</sup>, György T. Balogh <sup>4,5</sup> and Attila Hunyadi <sup>1,6,\*</sup>

<sup>1</sup> Institute of Pharmacognosy, University of Szeged, H-6720 Szeged, Hungary

<sup>2</sup> Institute of Pharmaceutical Analysis, University of Szeged, H-6720 Szeged, Hungary

<sup>3</sup> Graduate Institute of Natural Products, Kaohsiung Medical University, Kaohsiung 807, Taiwan

<sup>4</sup> Institute of Pharmacodynamics and Biopharmacy, University of Szeged, H-6720 Szeged, Hungary

<sup>5</sup> Department of Chemical and Environmental Process Engineering, Budapest University of Technology and Economics, H-1111 Budapest, Hungary

<sup>6</sup> Interdisciplinary Centre of Natural Products, University of Szeged, H-6720 Szeged, Hungary

\* Correspondence: hunyadi.attila@szte.hu; Tel.: +36-62545557

† These authors contributed equally to this work.

‡ On leave from the Department of Pharmaceutical Chemistry, Faculty of Pharmacy, University of Khartoum, 11111 Khartoum, Sudan.

## Table of contents

**Figure S1.** HRMS spectrum of compound 4

**Figure S2.** HRMS spectrum of compound 12

**Figure S3.** HRMS spectrum of compound 14

**Figure S4.** HRMS spectrum of compound 15

**Figure S5.** HRMS spectrum of compound 16

**Figure S6.** HRMS spectrum of compound 17

**Figure S7.** HRMS spectrum of compound 18

**Figure S8.** HRMS spectrum of compound 22

**Figure S9.** <sup>1</sup>H-NMR spectrum of compound 4

**Figure S10.** <sup>13</sup>C-NMR spectrum of compound 4

**Figure S11.**  $^1\text{H}$ -NMR spectrum of compound **12**

**Figure S12.**  $^{13}\text{C}$ -NMR spectrum of compound **12**

**Figure S13.**  $^1\text{H}$ -NMR spectrum of compound **14**

**Figure S14.**  $^{13}\text{C}$ -NMR spectrum of compound **14**

**Figure S15.**  $^1\text{H}$ -NMR spectrum of compound **15**

**Figure S16.**  $^{13}\text{C}$ -NMR spectrum of compound **15**

**Figure S17.**  $^1\text{H}$ -NMR spectrum of compound **16**

**Figure S18.**  $^{13}\text{C}$ -NMR spectrum of compound **16**

**Figure S19.**  $^1\text{H}$ -NMR spectrum of compound **17**

**Figure S20.**  $^{13}\text{C}$ -NMR spectrum of compound **17**

**Figure S21.**  $^1\text{H}$ -NMR spectrum of compound **18**

**Figure S22.**  $^{13}\text{C}$ -NMR spectrum of compound **18**

**Figure S23.**  $^1\text{H}$ -NMR spectrum of compound **22**

**Figure S24.**  $^{13}\text{C}$ -NMR spectrum of compound **22**

**Figure S25.** Correlation between the antiplatelet and COX-1 inhibitory activities of the tested compounds

**Table 1.** Docking results obtained using AutoDockTools 1.5.7 and Discovery Studio visualizer (21.1.0.20298)

**Figure S1.** HRMS spectrum of compound **4**

GT-20201212POS-1 #3536-3547 RT: 18.38-18.39 AV: 4 NL: 1.11E9  
T: FTMS + p ESI Full lock ms [100.0000-1000.0000]

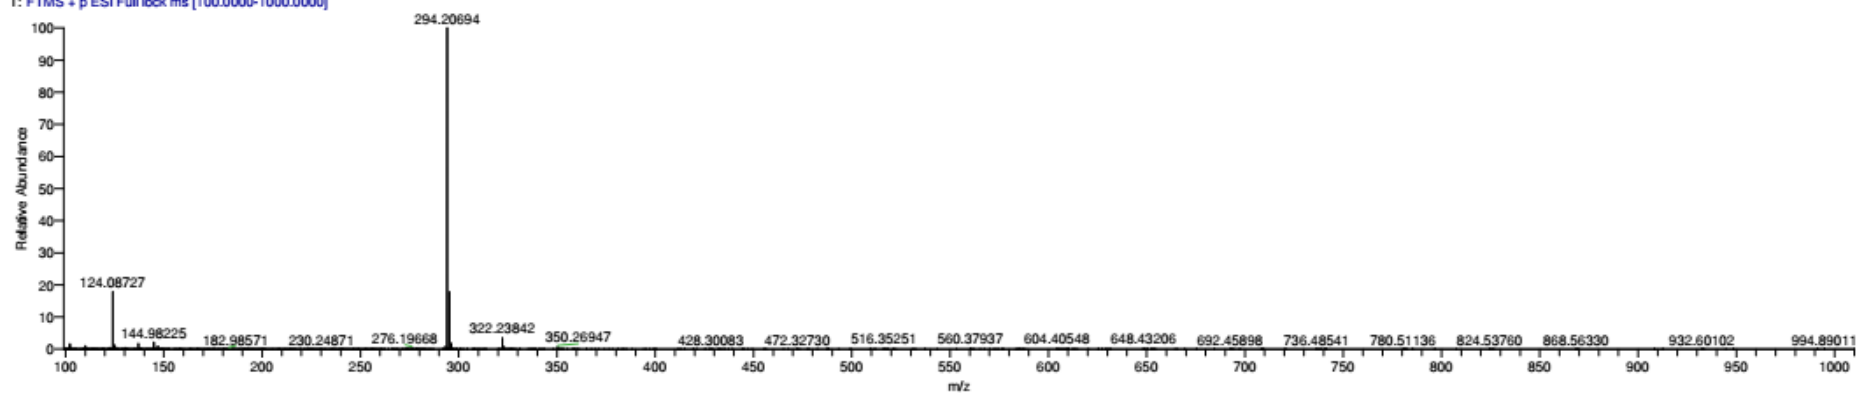

GT-20201212POS-1 #3536-3547 RT: 18.38-18.39 AV: 4 NL: 1.11E9  
T: FTMS + p ESI Full lock ms [100.0000-1000.0000]

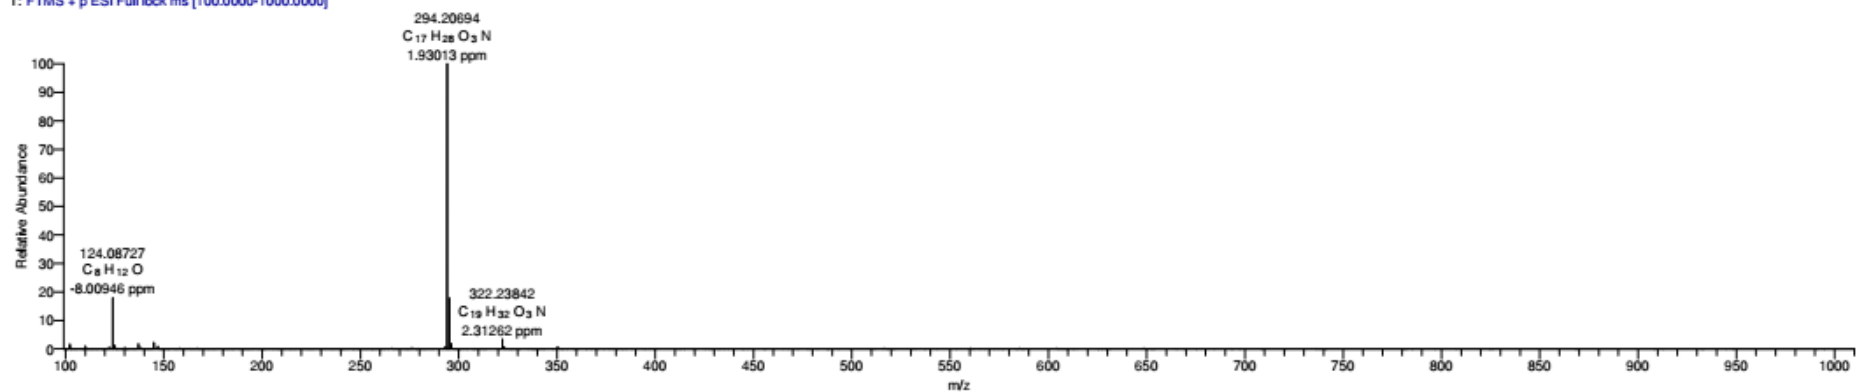

Figure S2. HRMS spectrum of compound 12

GT20210526 #80-82 RT: 0.53-0.54 AV: 3 NL: 2.72E8

T: FTMS • p ESI Full ms [100.0000-1000.0000]

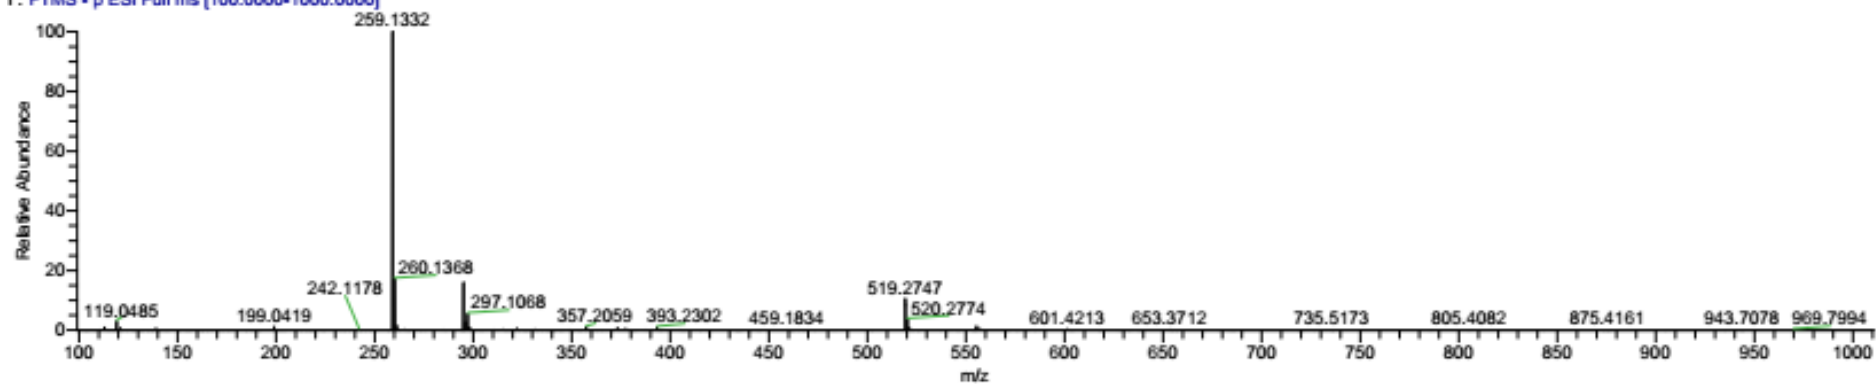

GT20210526 #80-82 RT: 0.53-0.54 AV: 3 NL: 2.72E8

T: FTMS • p ESI Full ms [100.0000-1000.0000]

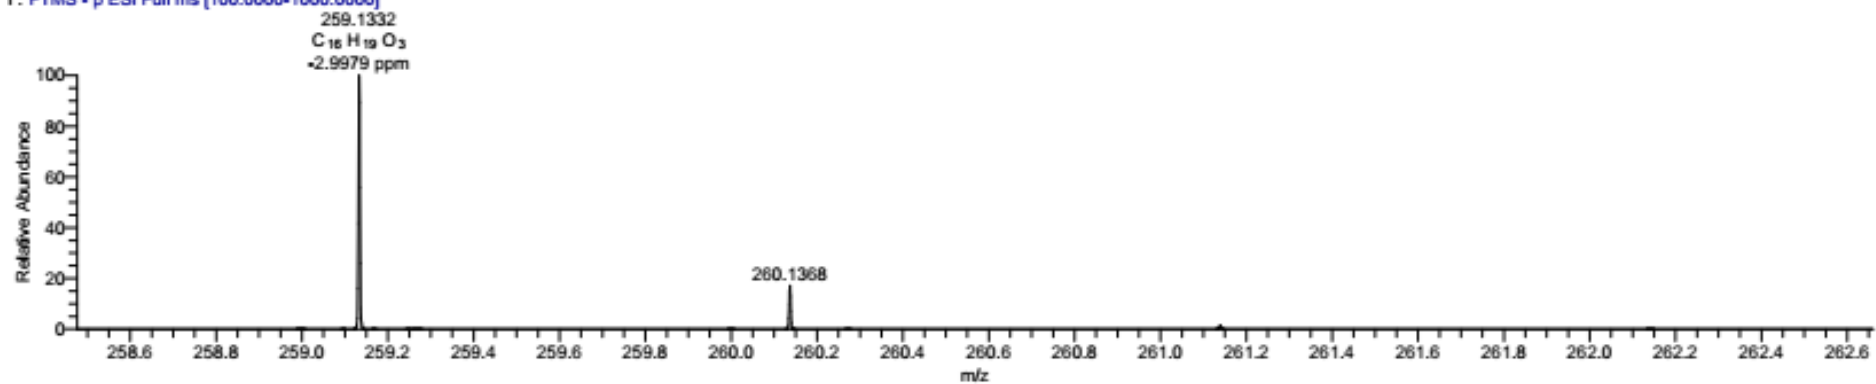

Figure S3. HRMS spectrum of compound 14

GT20210305POS-1 #2129-2188 RT: 11.31-11.61 AV: 60 NL: 1.09E9  
T: FTMS + p ESI Full ms [100.0000-1000.0000]

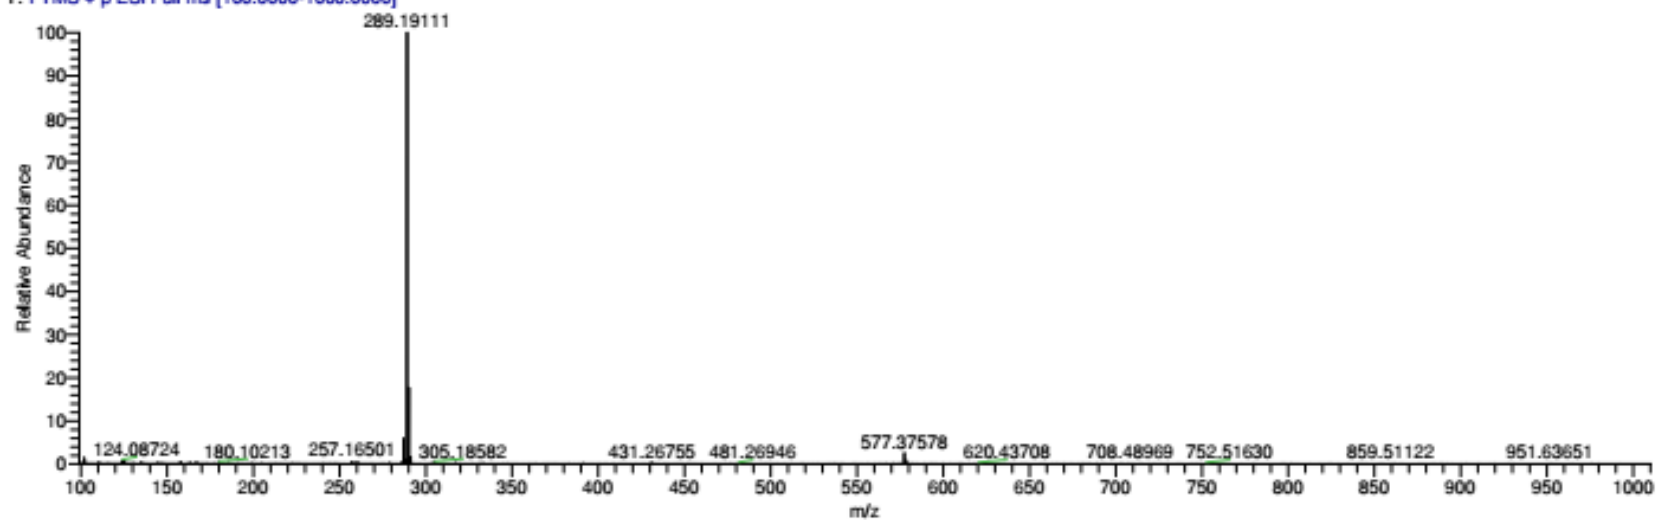

GT20210305POS-1 #2129-2188 RT: 11.31-11.61 AV: 60 NL: 1.09E9  
T: FTMS + p ESI Full ms [100.0000-1000.0000]

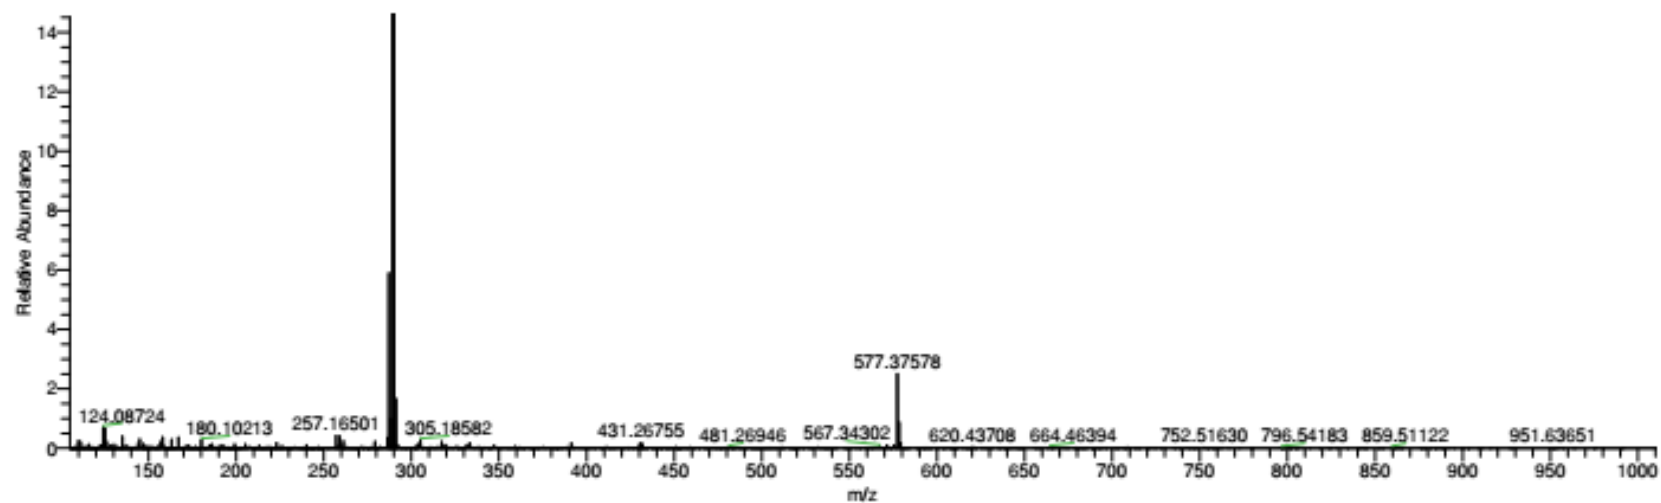

**Figure S4.** HRMS spectrum of compound 15

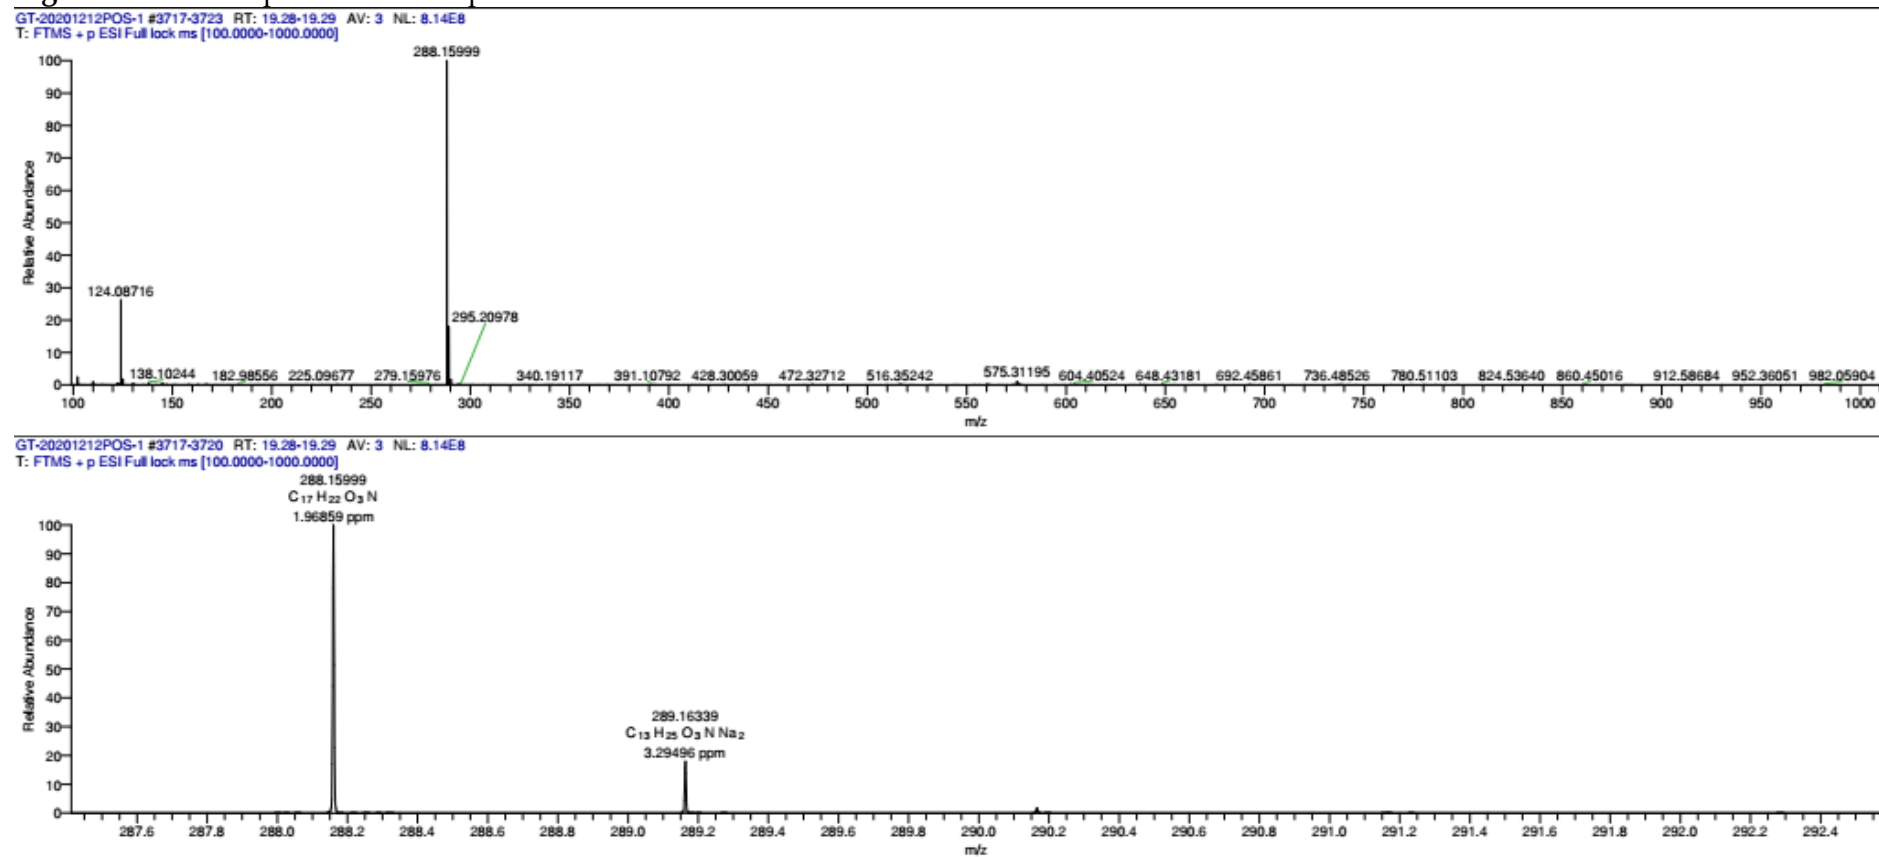

Figure S5. HRMS spectrum of compound 16

GT20210305POS-1 #494-528 RT: 2.63-2.81 AV: 35 NL: 8.66E8

T: FTMS + p ESI Full lock ms [100.0000-1000.0000]

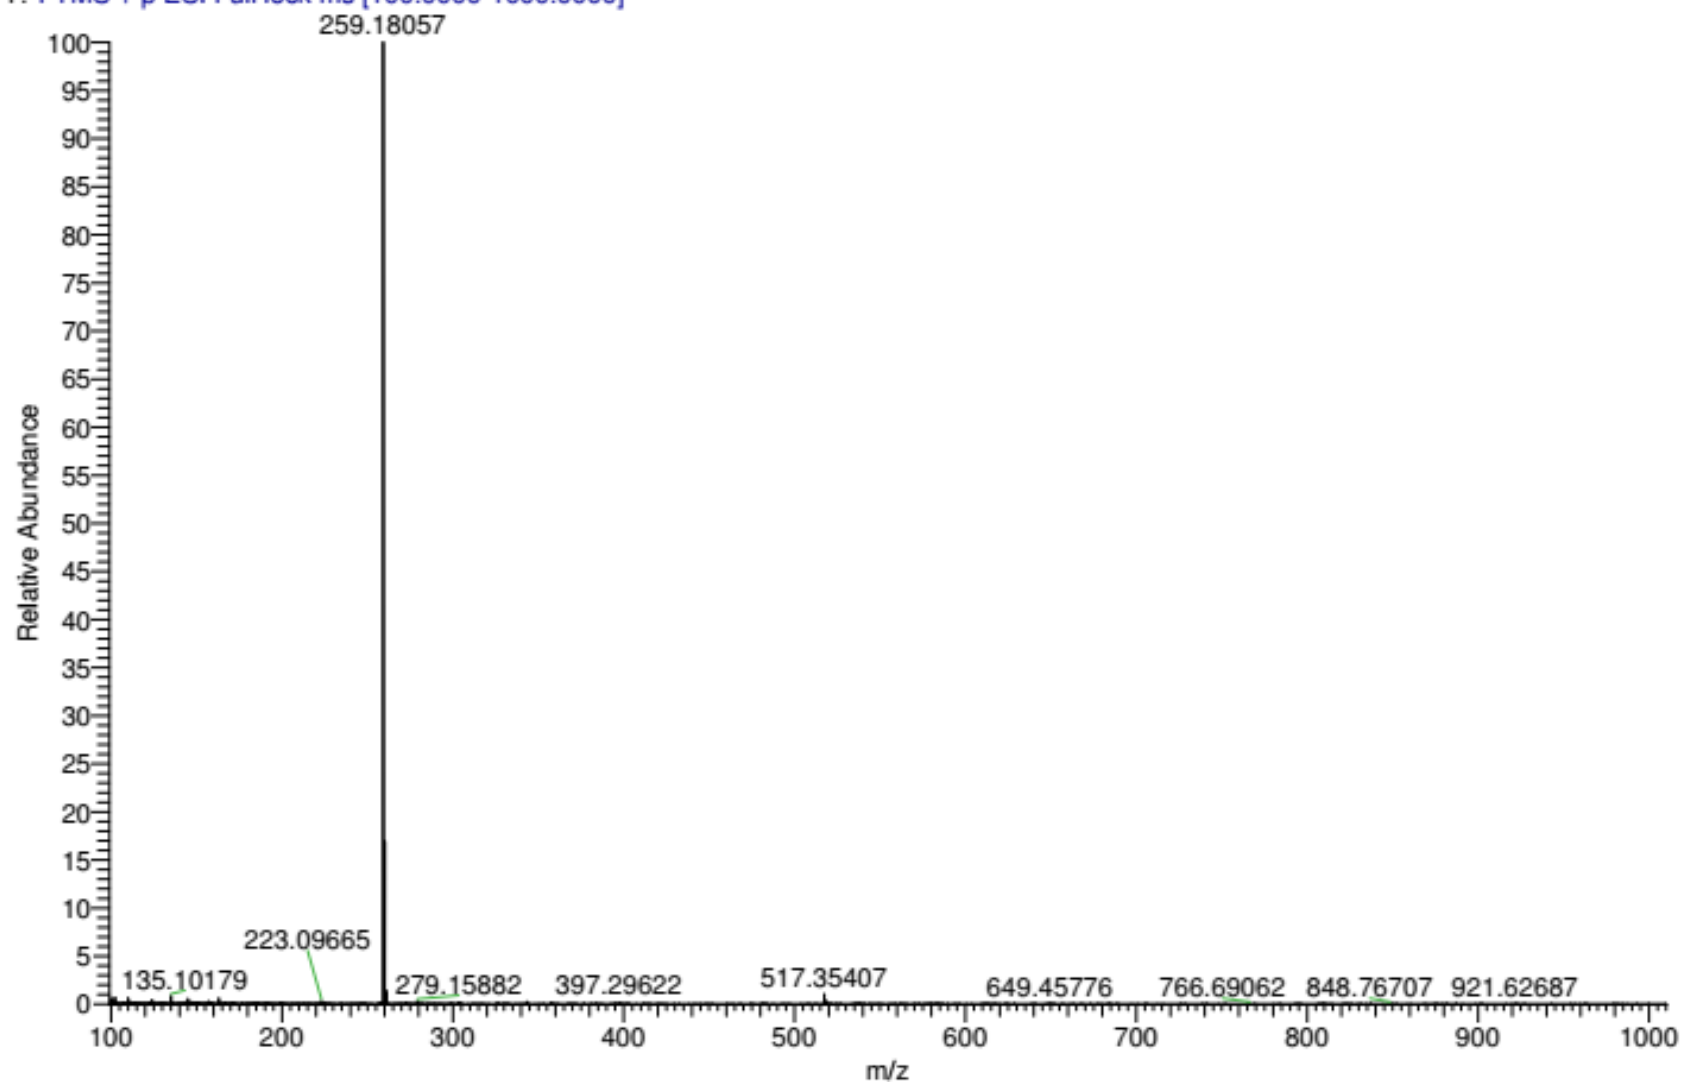

**Figure S6.** HRMS spectrum of compound **17**

GT20210305POS-1 #822-852 RT: 4.36-4.51 AV: 31 NL: 6.03E8  
T: FTMS + p ESI Full lock ms [100.0000-1000.0000]

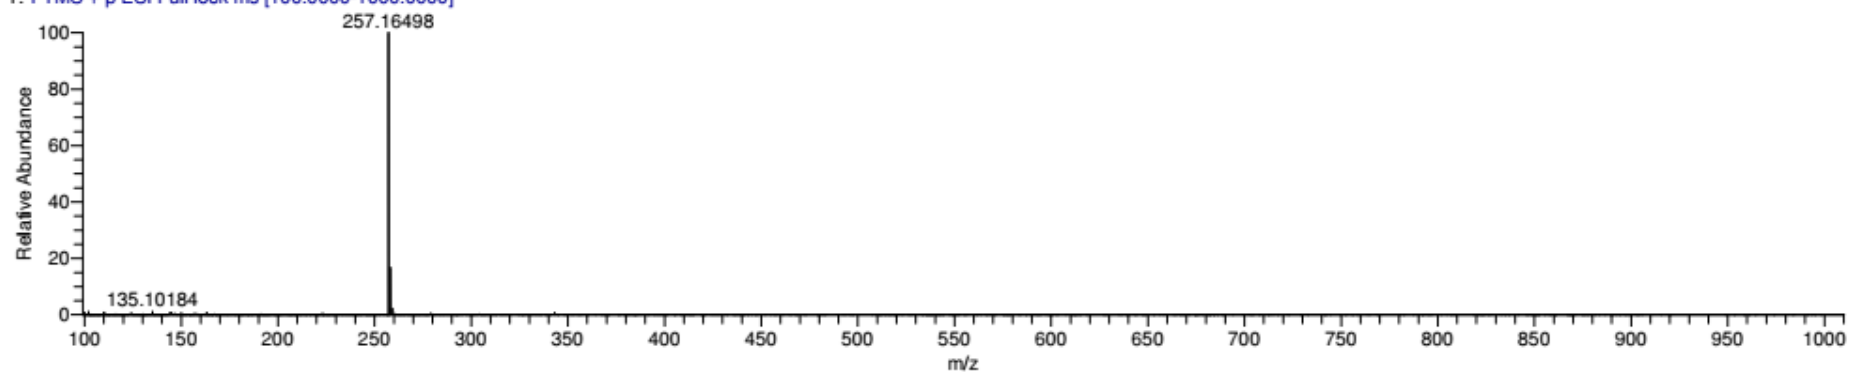

GT20210305POS-1 #822-852 RT: 4.36-4.51 AV: 31 NL: 6.03E8  
T: FTMS + p ESI Full lock ms [100.0000-1000.0000]

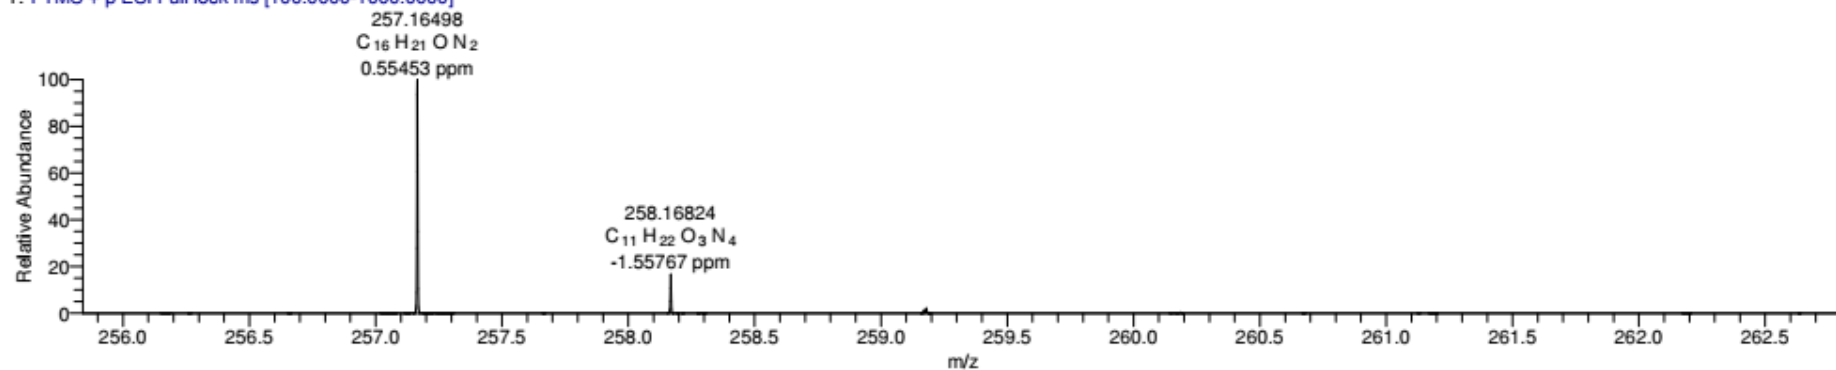



**Figure S7.** HRMS spectrum of compound **18**

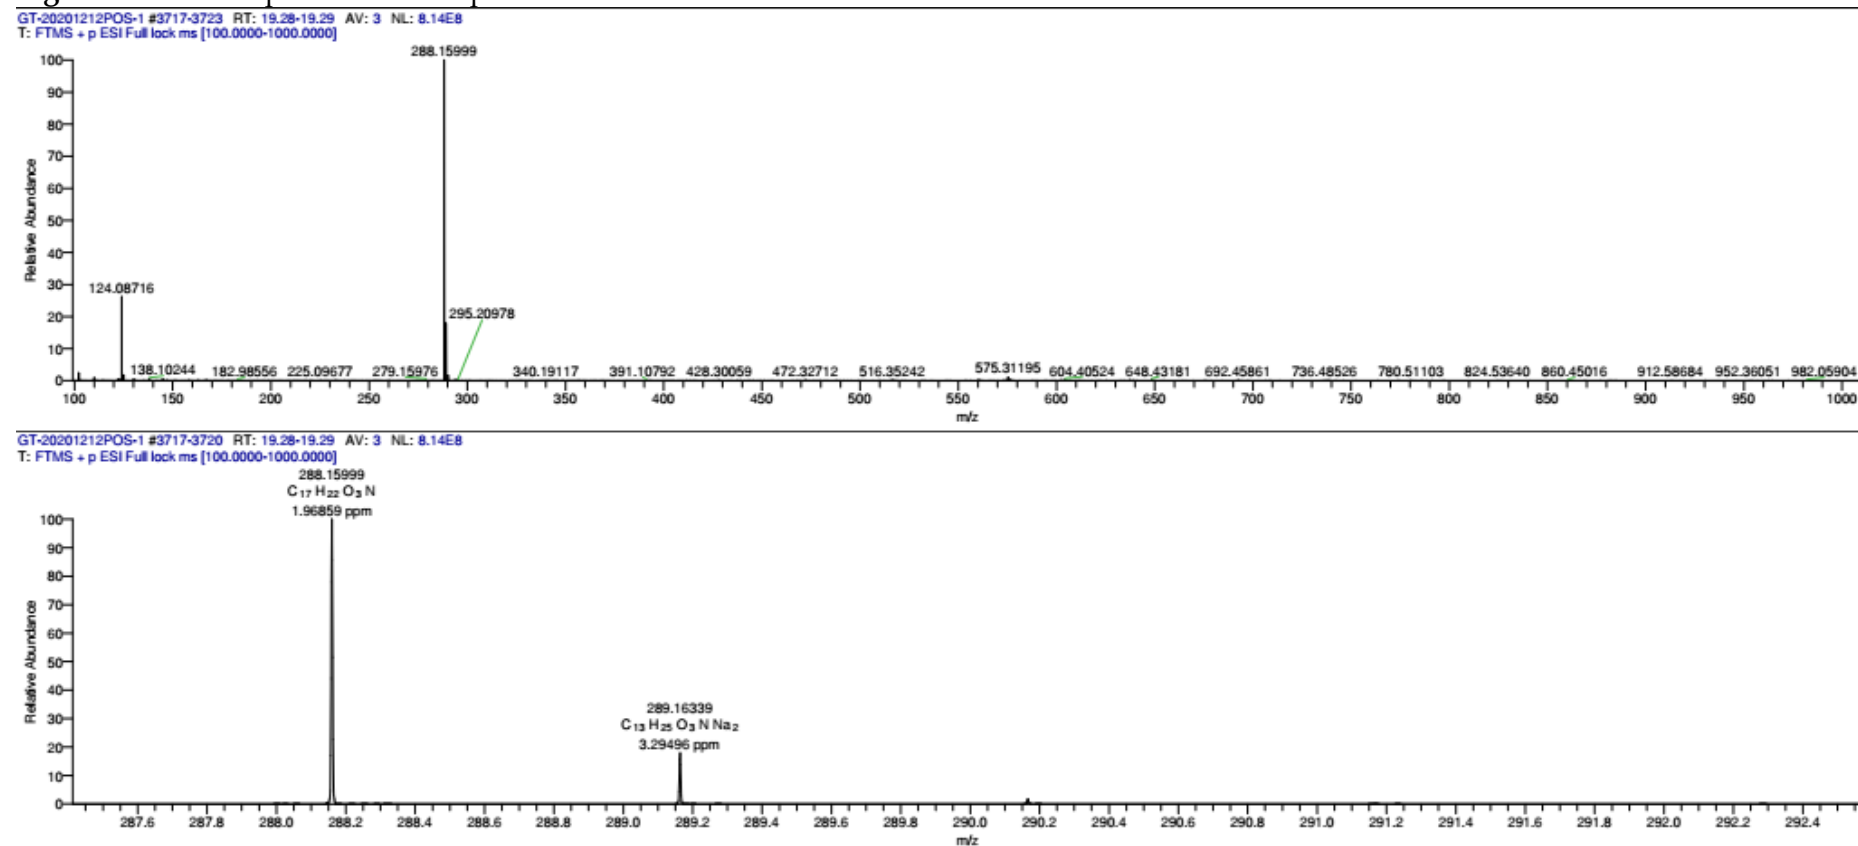

**Figure S8.** HRMS spectrum of compound 22

GT-20210122NEG-1 #1154-1166 RT: 7.07-7.14 AV: 13 NL: 5.63E7  
T: FTMS - p ESI Full lock ms [100.0000-1000.0000]

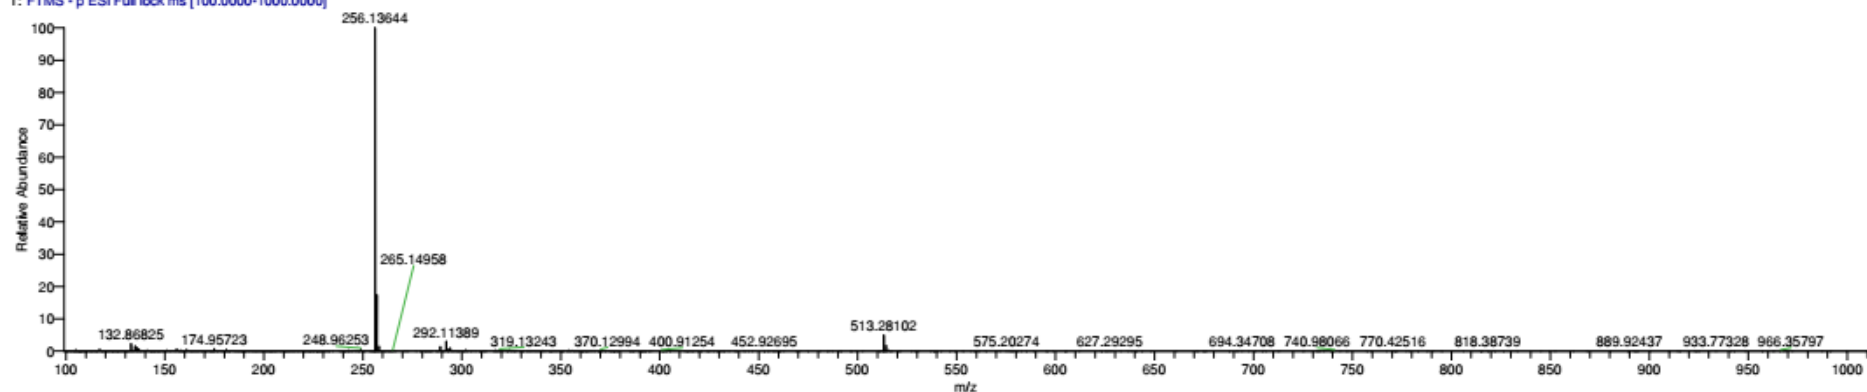

GT-20210122NEG-1 #1154-1166 RT: 7.07-7.14 AV: 13 NL: 5.63E7  
T: FTMS - p ESI Full lock ms [100.0000-1000.0000]

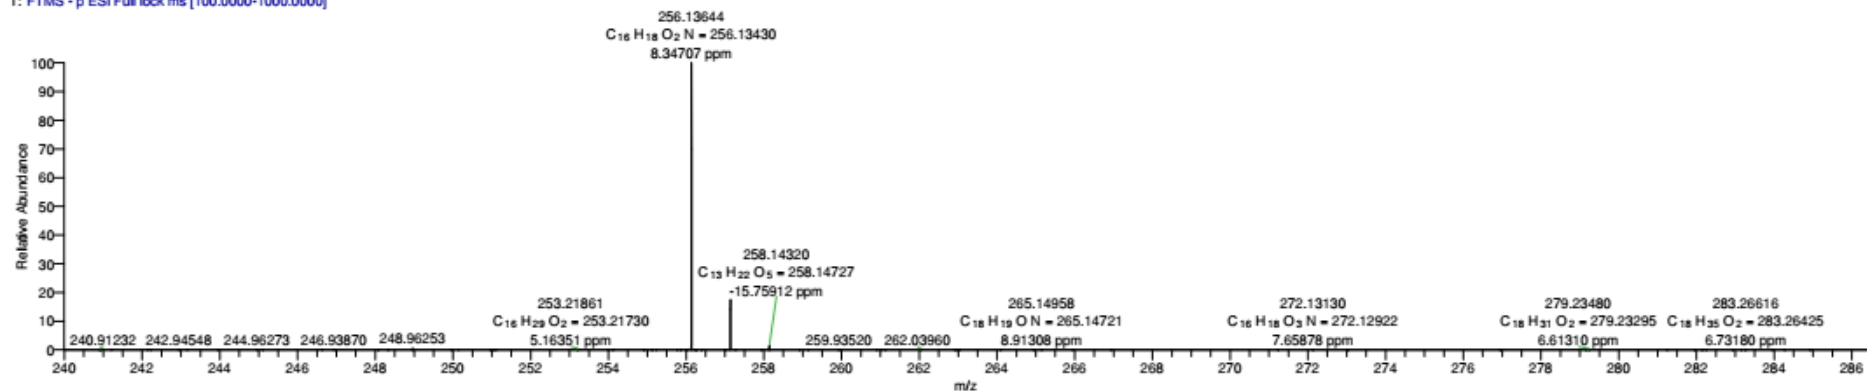

Figure S9.  $^1\text{H}$ -NMR spectrum of compound 4

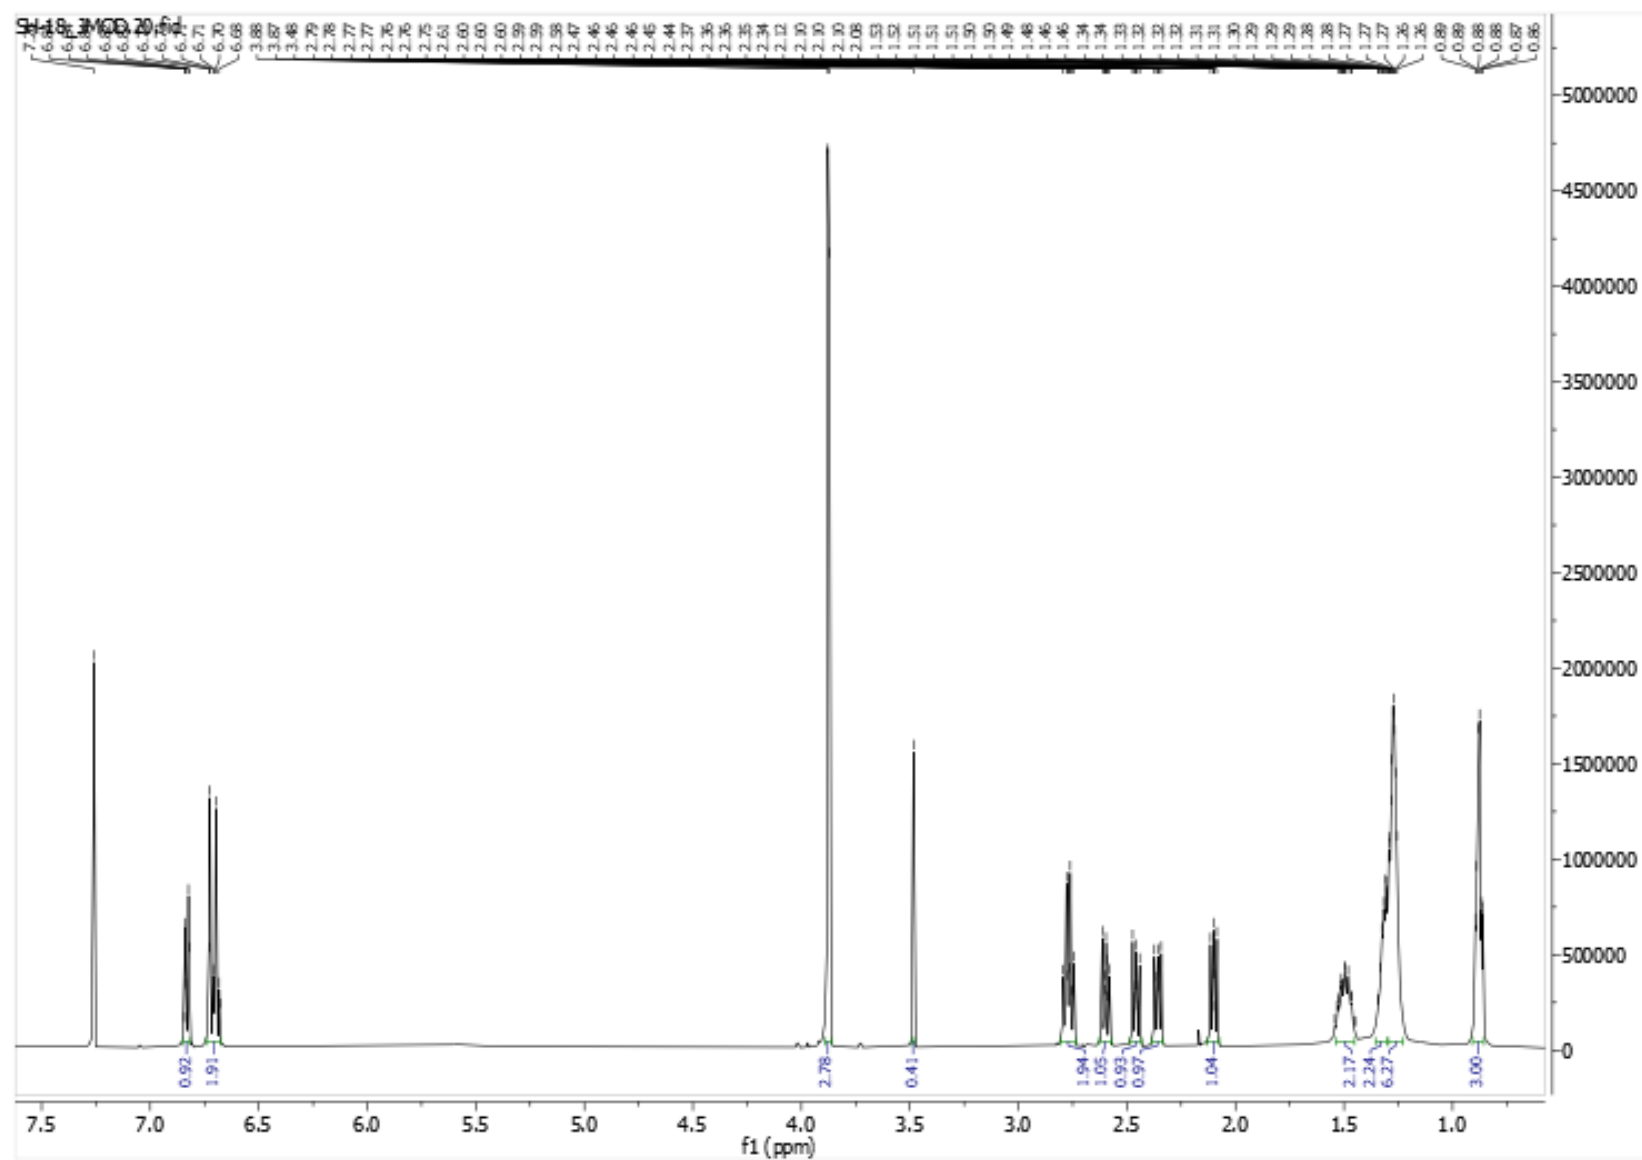

Figure S10.  $^{13}\text{C}$ -NMR spectrum of compound 4

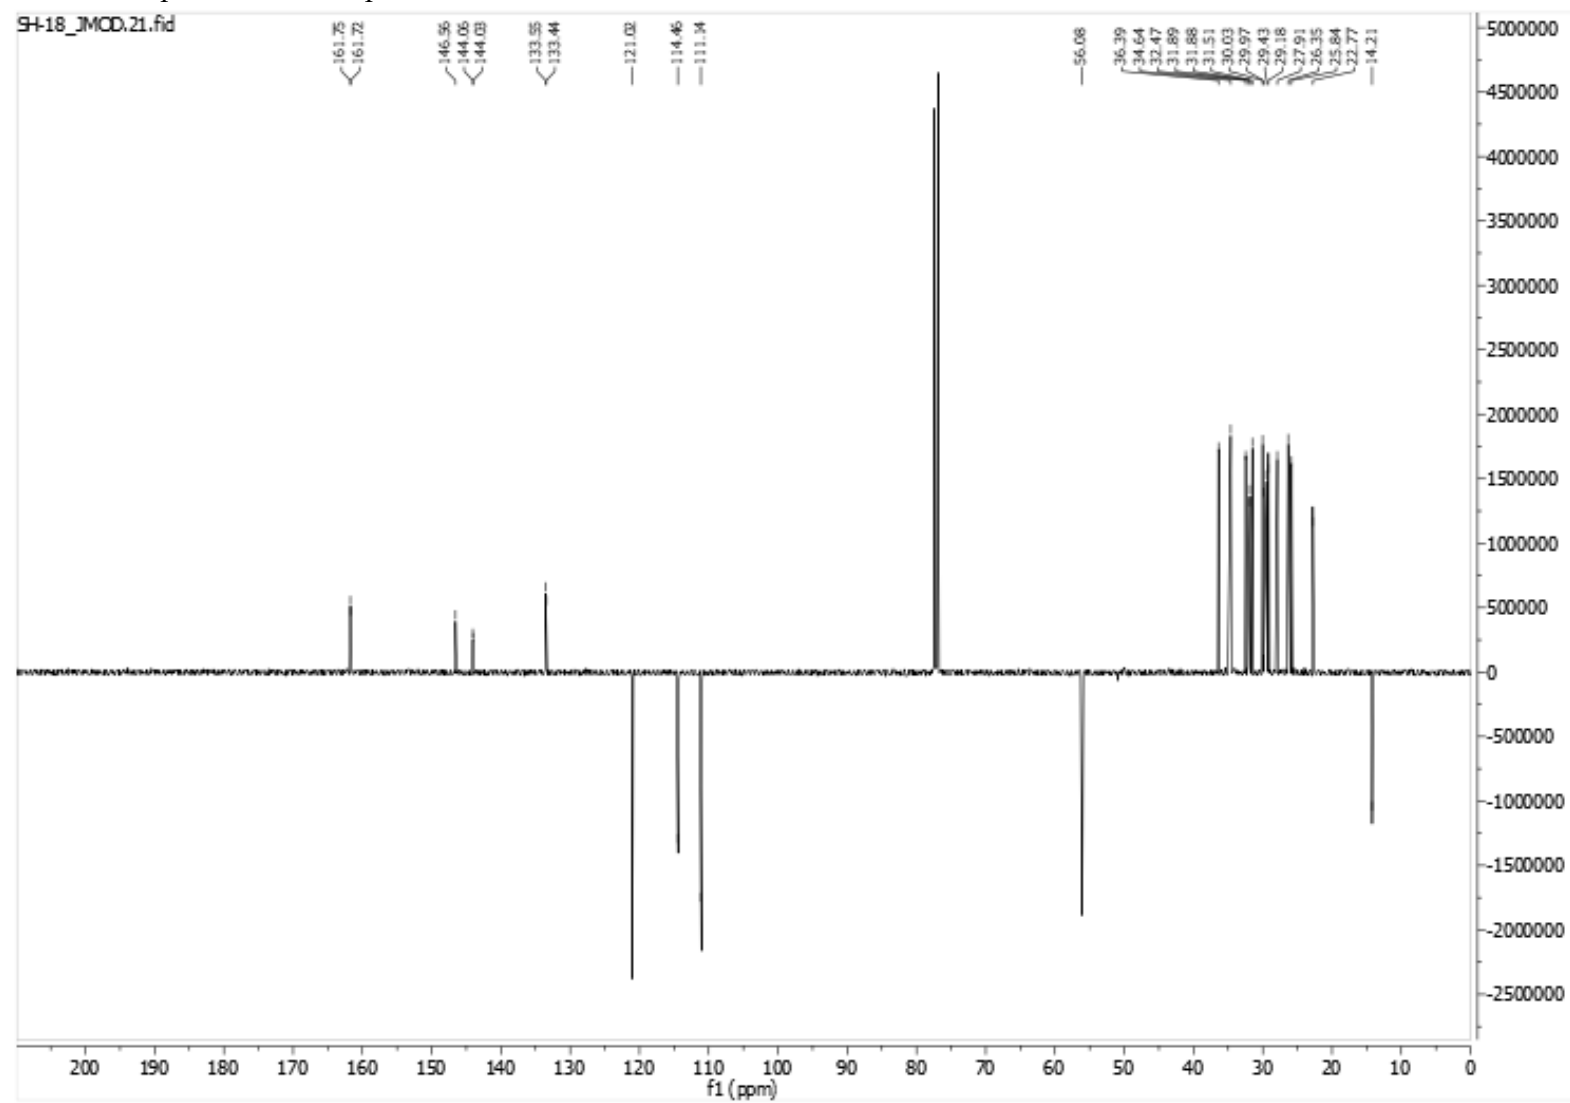

Figure S11.  $^1\text{H}$ -NMR spectrum of compound 12

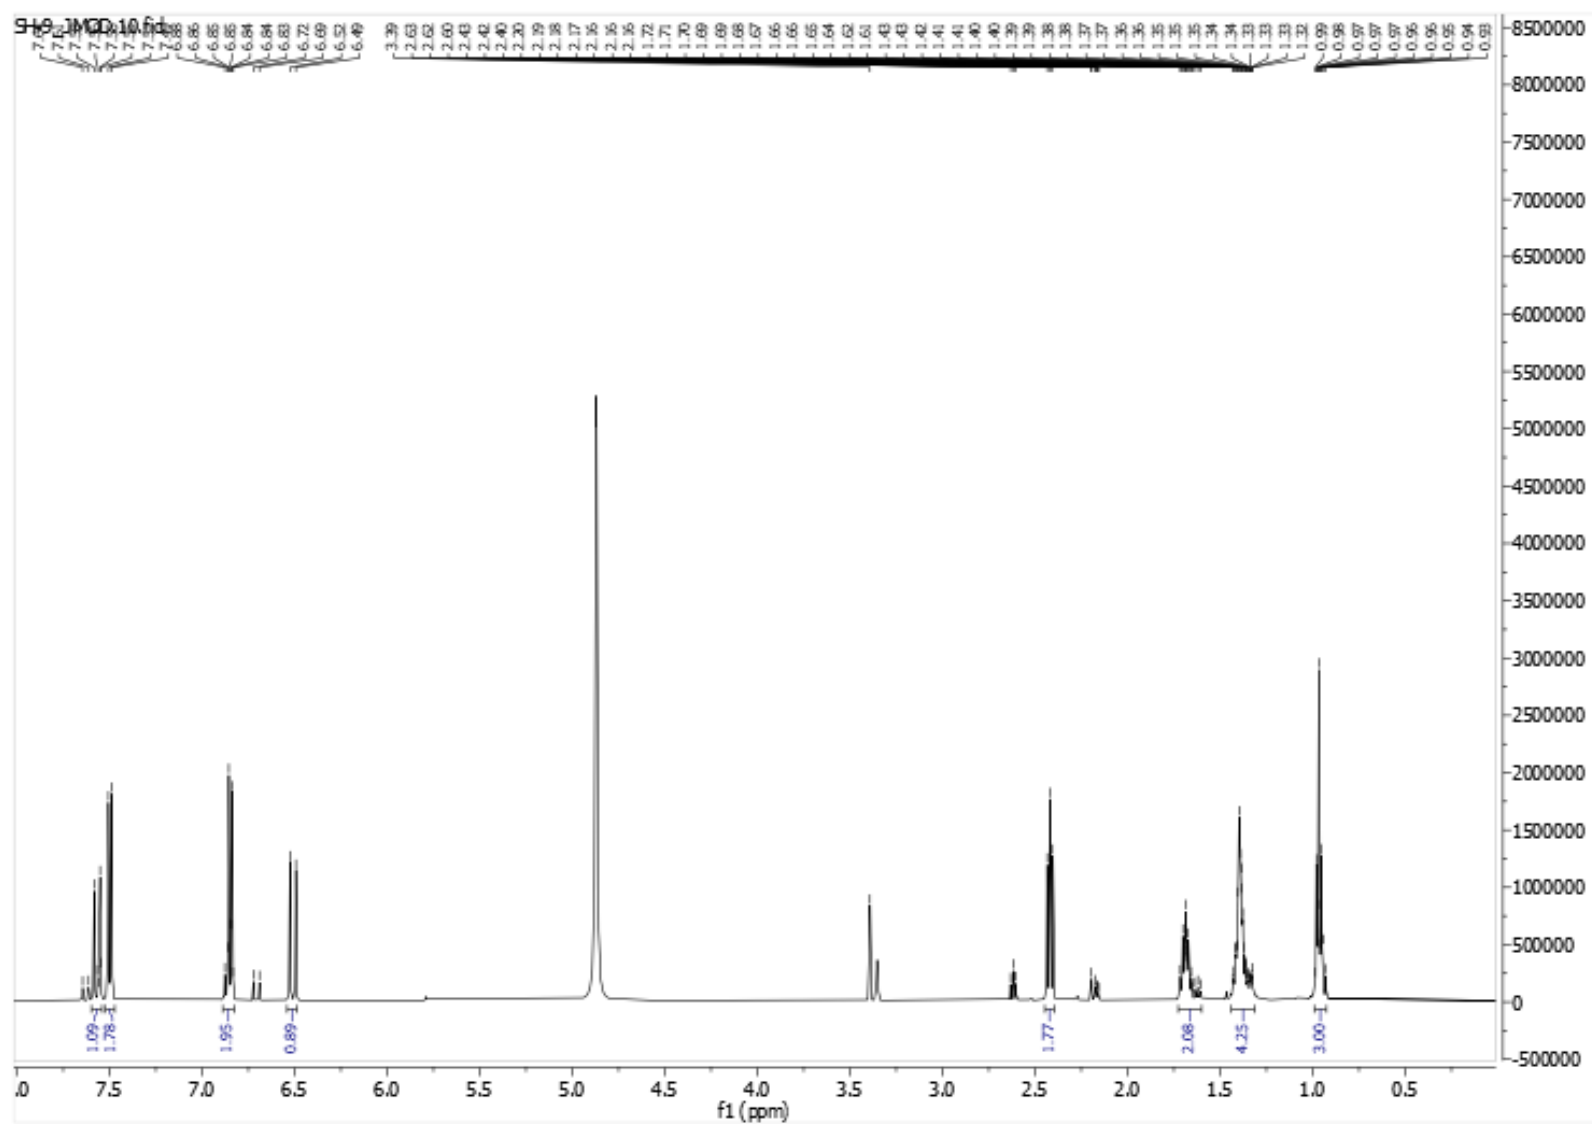

**Figure S12.**  $^{13}\text{C}$ -NMR spectrum of compound **12**

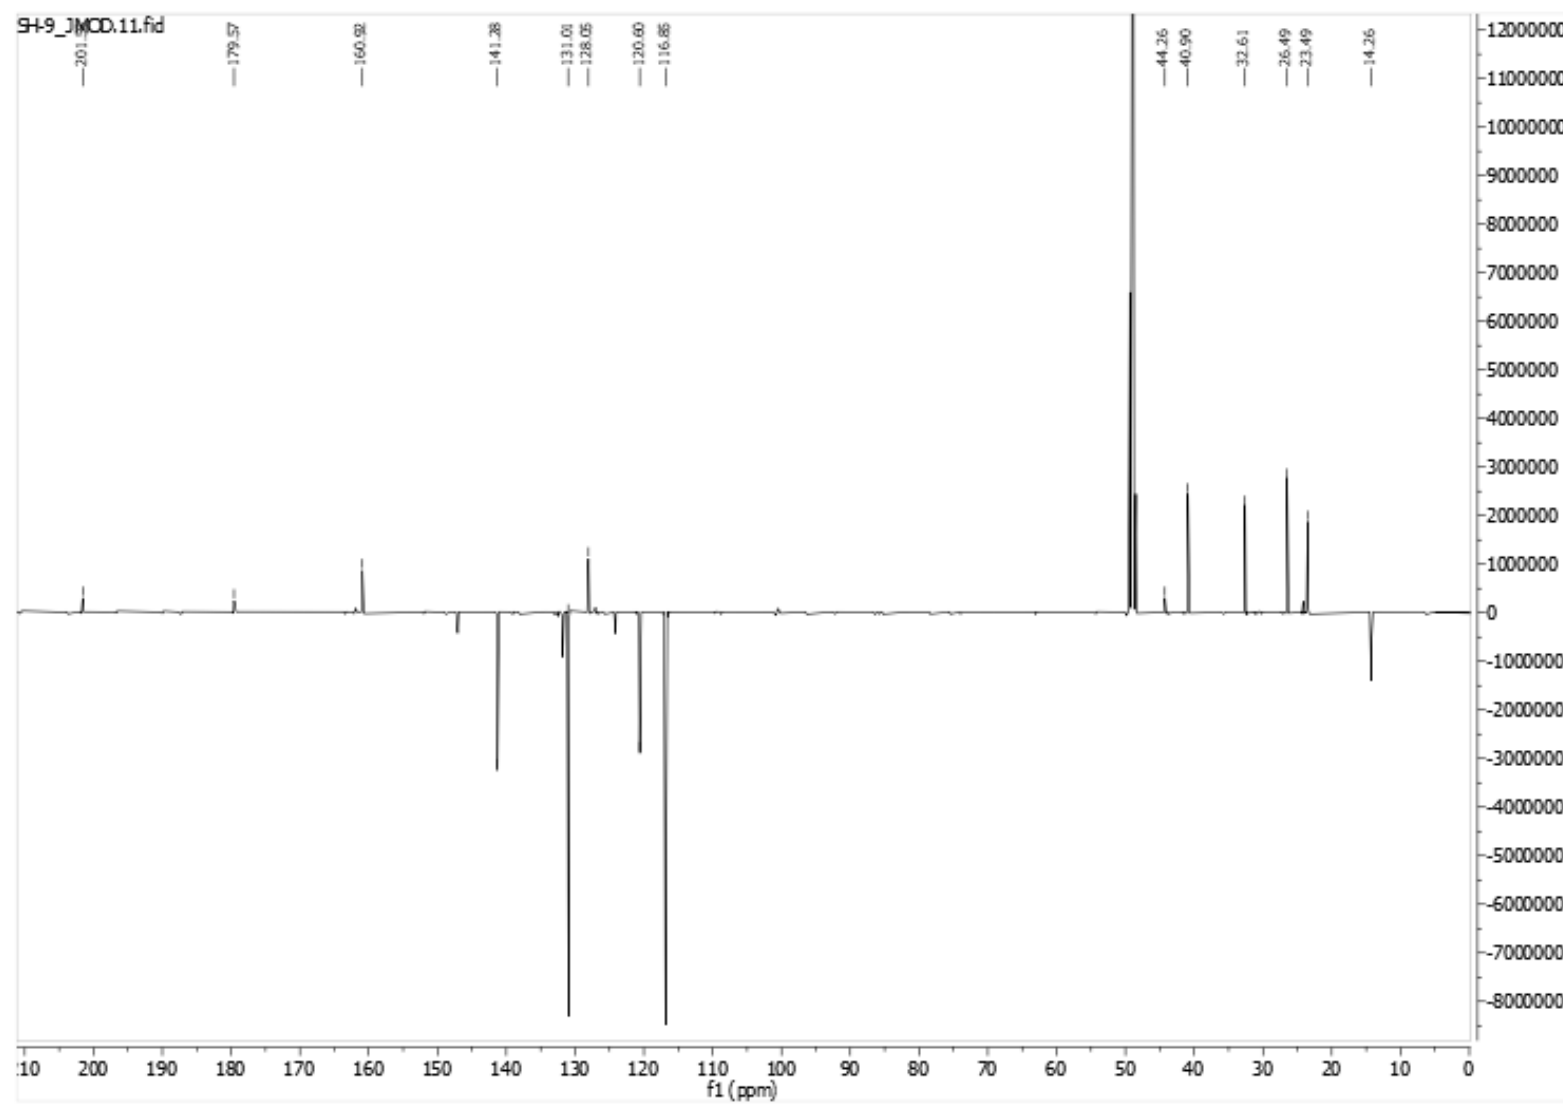

Figure S13.  $^1\text{H}$ -NMR spectrum of compound 14

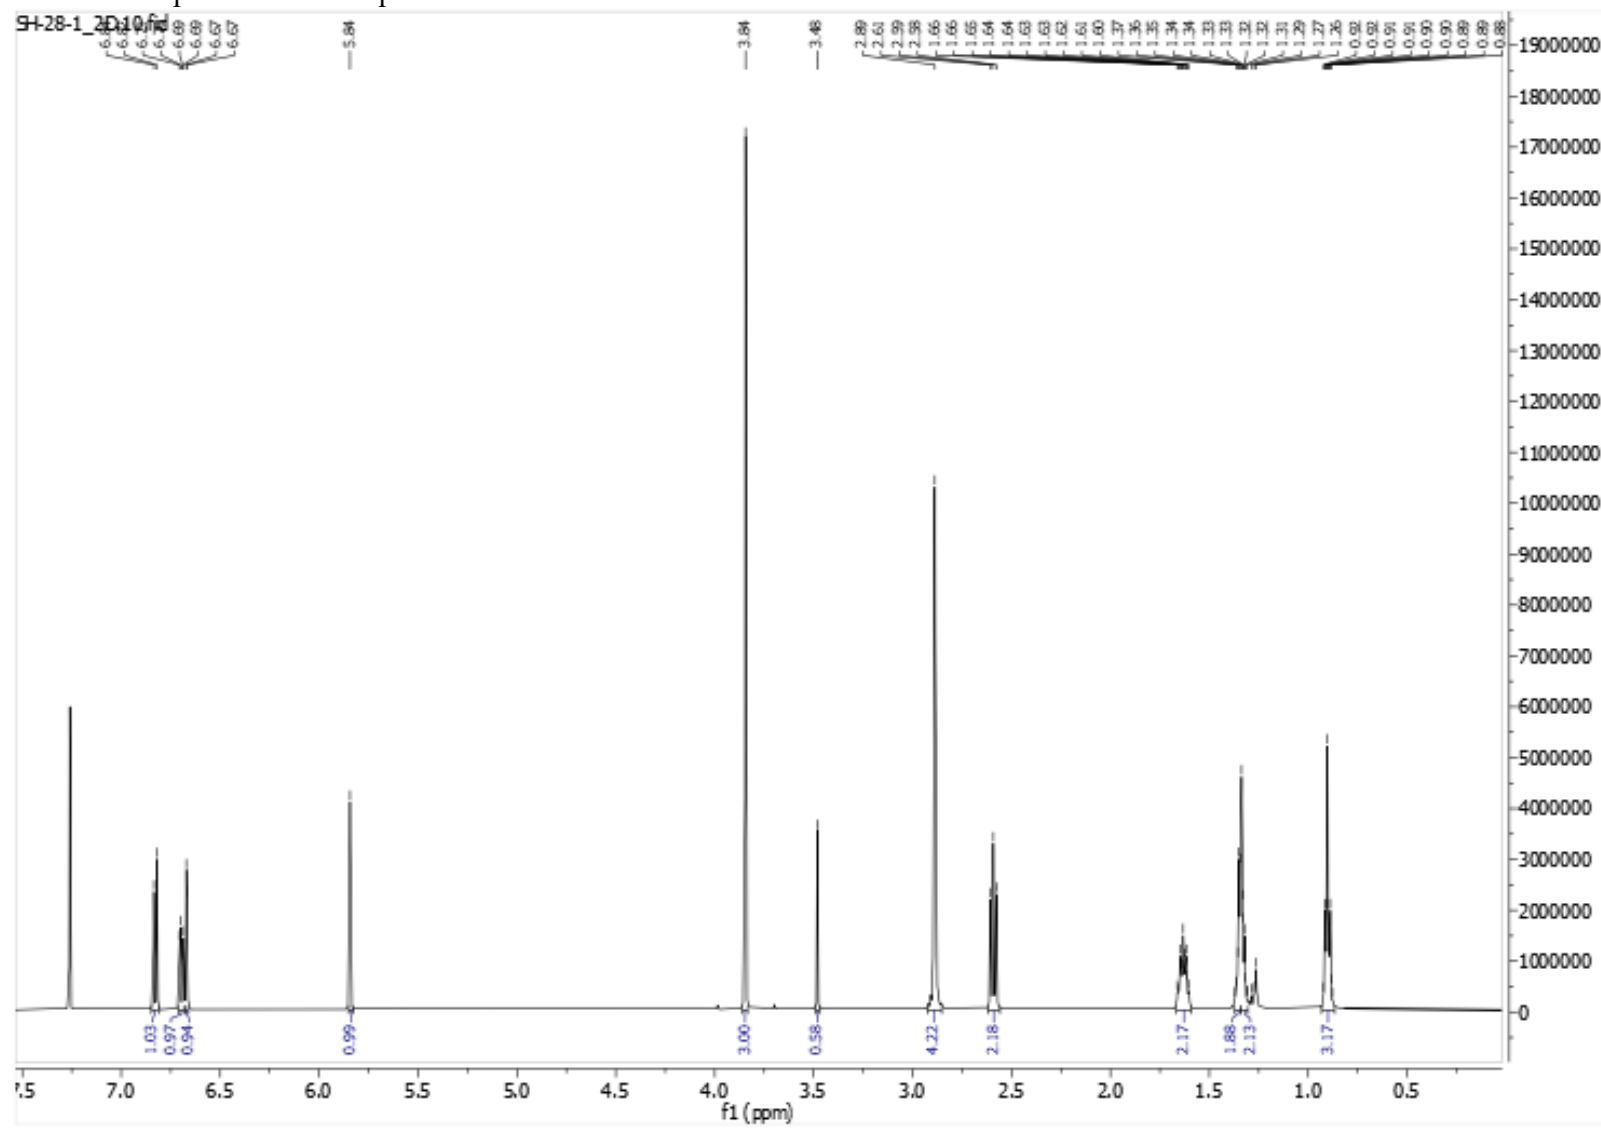

Figure S14.  $^{13}\text{C}$ -NMR spectrum of compound **14**

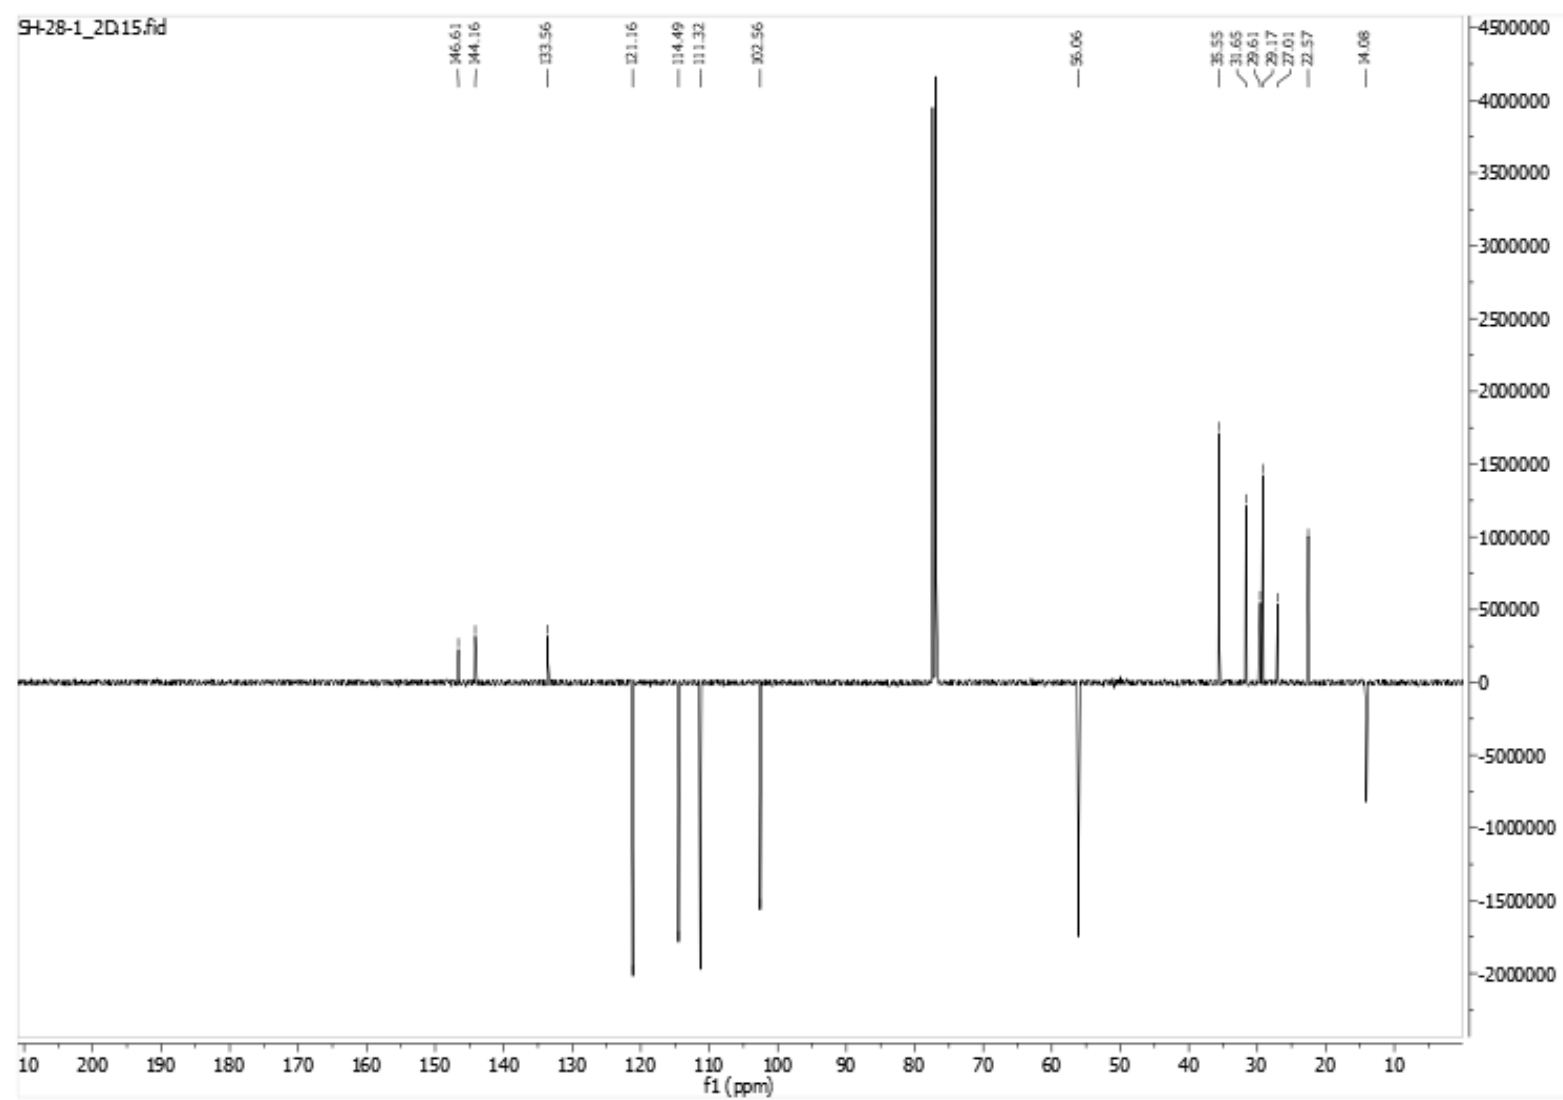



Figure S15.  $^1\text{H}$ -NMR spectrum of compound 15

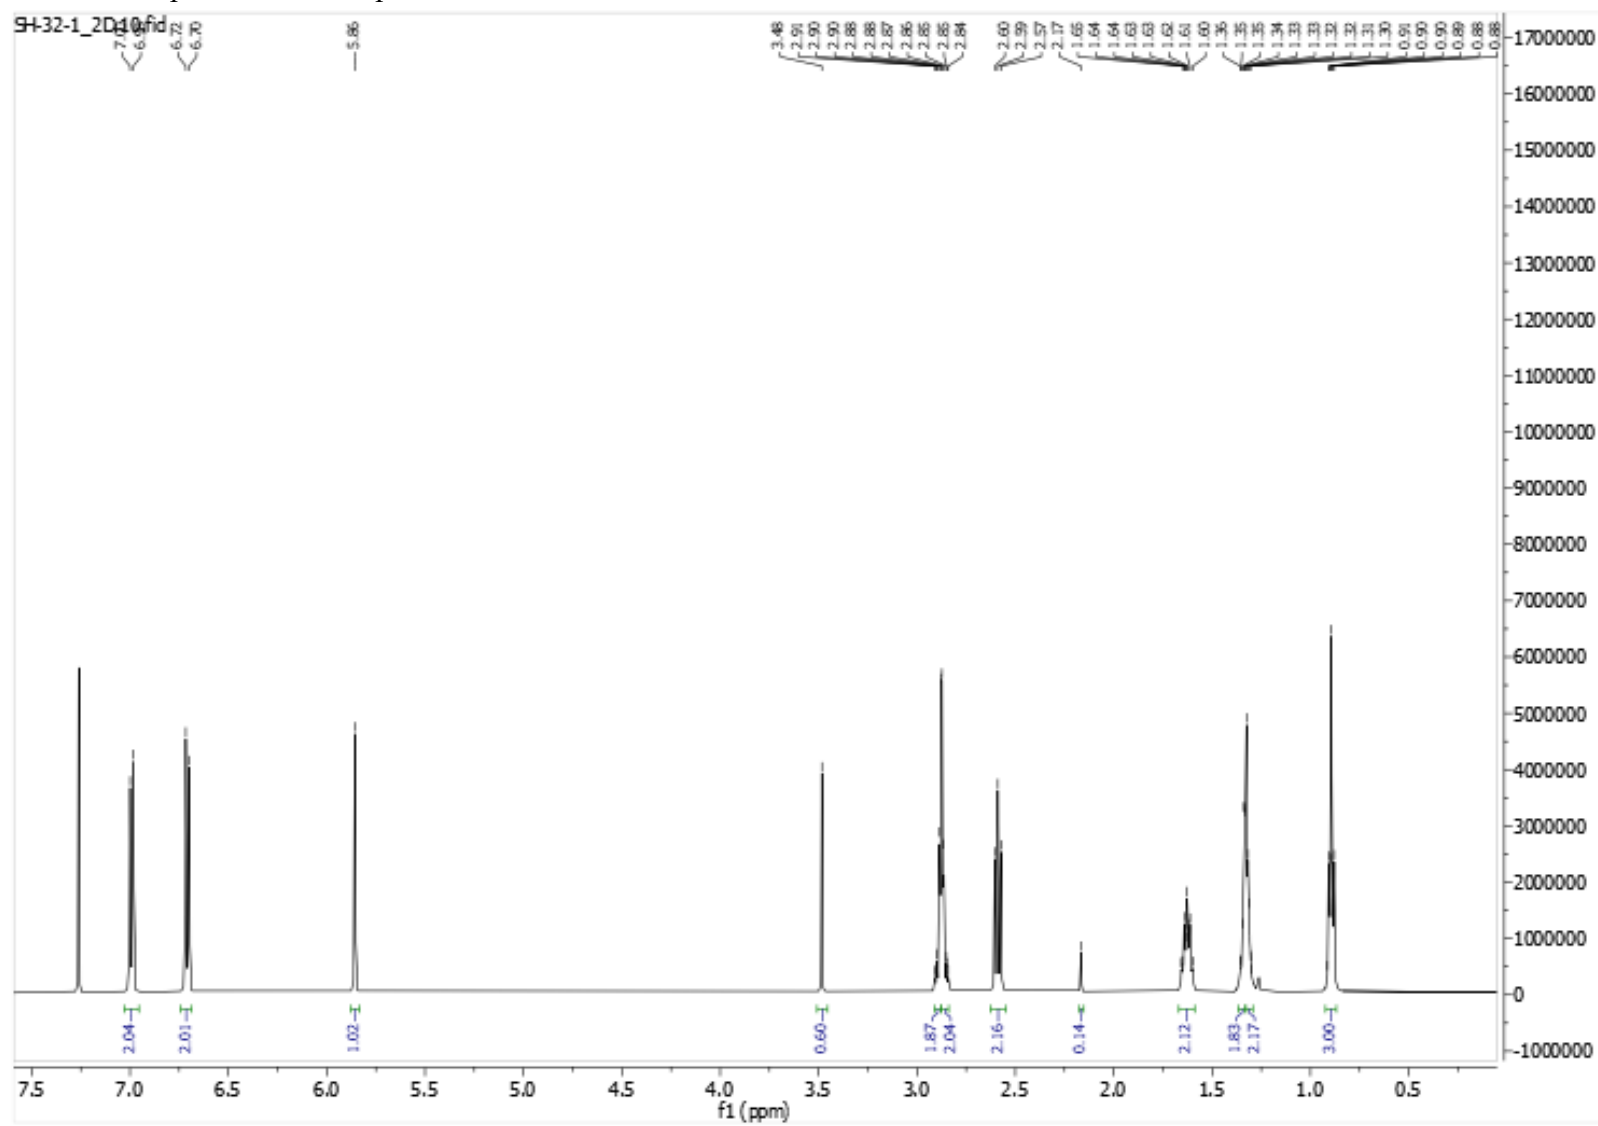

Figure S16.  $^{13}\text{C}$ -NMR spectrum of compound 15

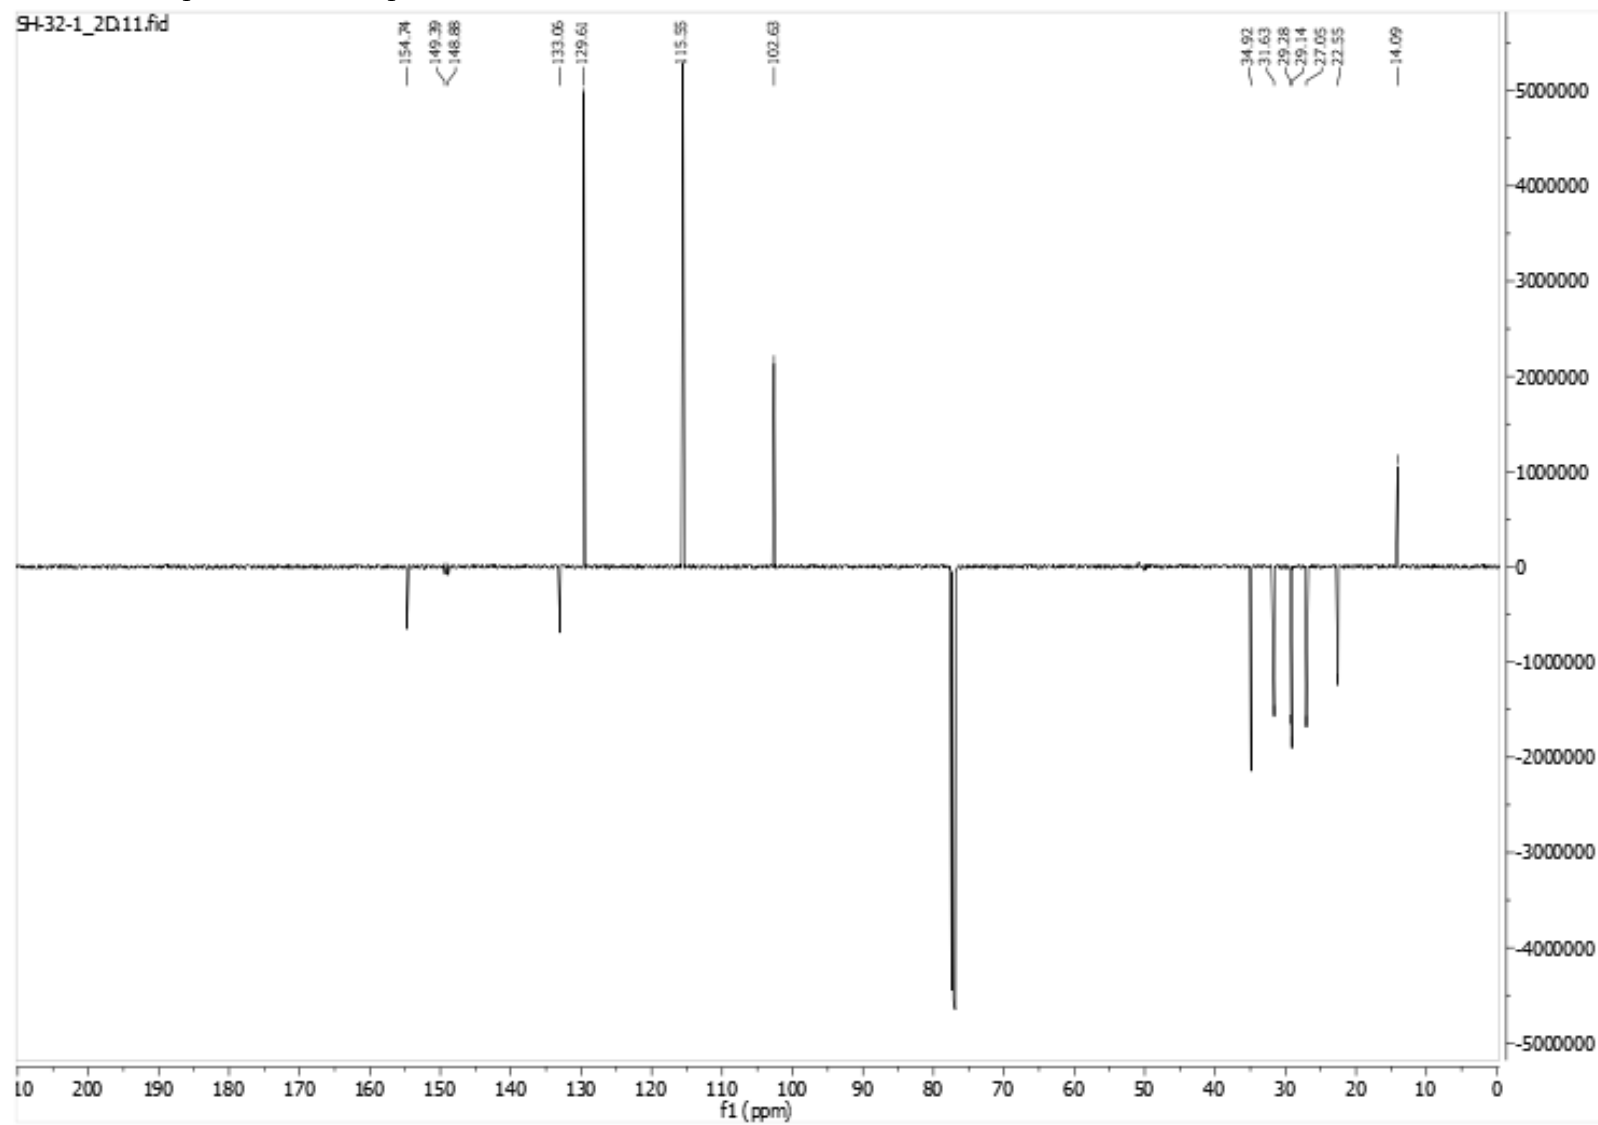

Figure S17.  $^1\text{H}$ -NMR spectrum of compound 16

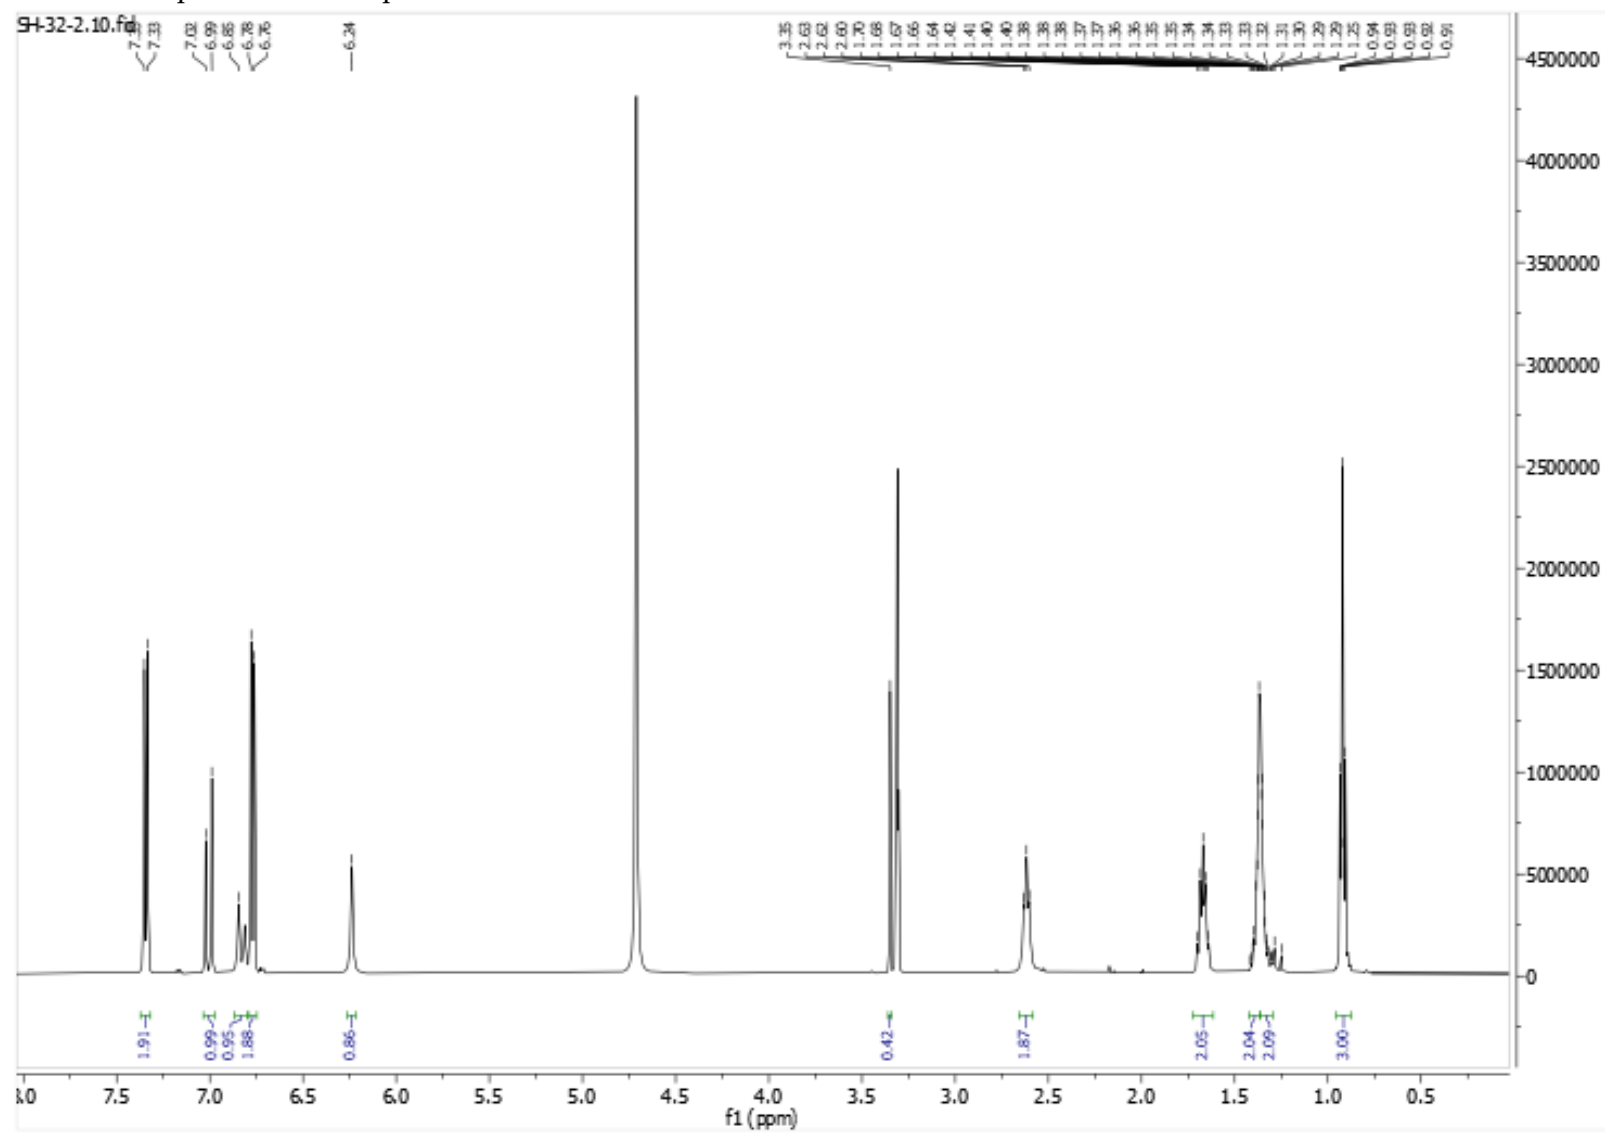

Figure S18.  $^{13}\text{C}$ -NMR spectrum of compound **16**

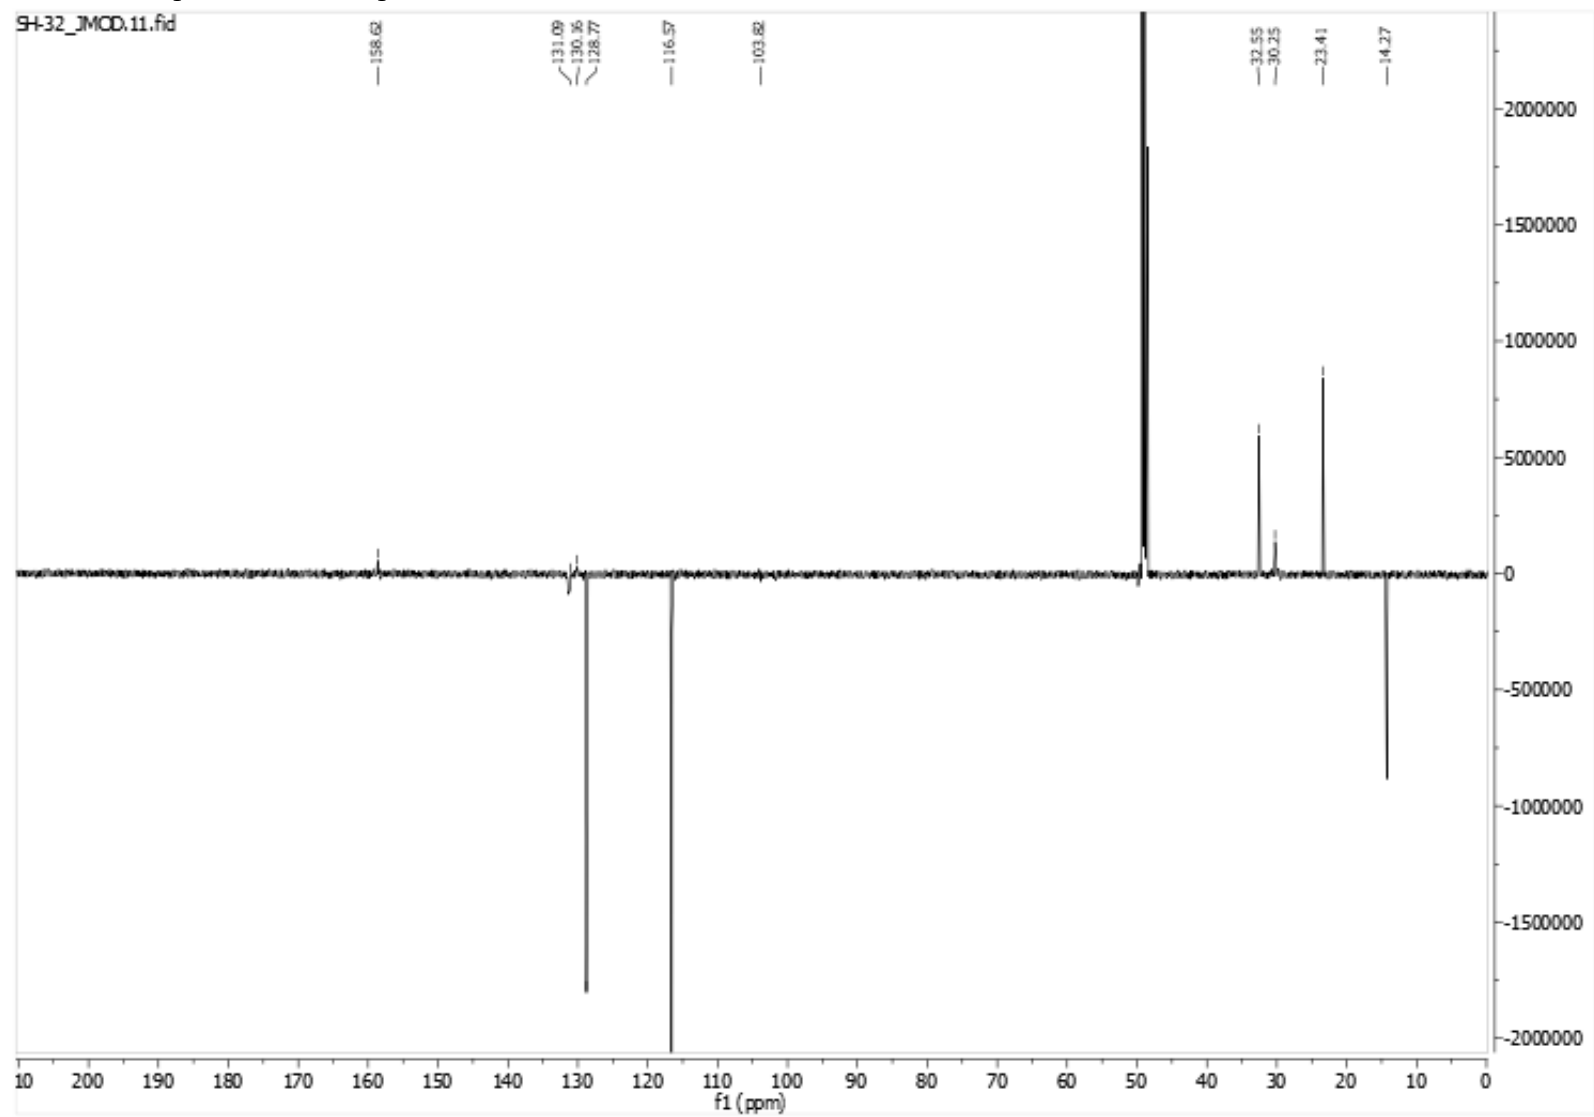

**9-24a**  $\text{CDCl}_3$  100 MHz

Chemical shift (ppm): 7.36, 7.35, 7.34, 7.33, 7.32, 7.31, 7.30, 7.29, 7.28, 7.27, 7.26, 7.25, 7.24, 7.23, 7.22, 7.21, 7.20, 7.19, 7.18, 7.17, 7.16, 7.15, 7.14, 7.13, 7.12, 7.11, 7.10, 7.09, 7.08, 7.07, 7.06, 7.05, 7.04, 7.03, 7.02, 7.01, 7.00, 6.99, 6.98, 6.97, 6.96, 6.95, 6.94, 6.93, 6.92, 6.91, 6.90, 6.89, 6.88, 6.87, 6.86, 6.85, 6.84, 6.83, 6.82, 6.81, 6.80, 6.79, 6.78, 6.77, 6.76, 6.75, 6.74, 6.73, 6.72, 6.71, 6.70, 6.69, 6.68, 6.67, 6.66, 6.65, 6.64, 6.63, 6.62, 6.61, 6.60, 6.59, 6.58, 6.57, 6.56, 6.55, 6.54, 6.53, 6.52, 6.51, 6.50, 6.49, 6.48, 6.47, 6.46, 6.45, 6.44, 6.43, 6.42, 6.41, 6.40, 6.39, 6.38, 6.37, 6.36, 6.35, 6.34, 6.33, 6.32, 6.31, 6.30, 6.29, 6.28, 6.27, 6.26, 6.25, 6.24, 6.23, 6.22, 6.21, 6.20, 6.19, 6.18, 6.17, 6.16, 6.15, 6.14, 6.13, 6.12, 6.11, 6.10, 6.09, 6.08, 6.07, 6.06, 6.05, 6.04, 6.03, 6.02, 6.01, 6.00, 5.99, 5.98, 5.97, 5.96, 5.95, 5.94, 5.93, 5.92, 5.91, 5.90, 5.89, 5.88, 5.87, 5.86, 5.85, 5.84, 5.83, 5.82, 5.81, 5.80, 5.79, 5.78, 5.77, 5.76, 5.75, 5.74, 5.73, 5.72, 5.71, 5.70, 5.69, 5.68, 5.67, 5.66, 5.65, 5.64, 5.63, 5.62, 5.61, 5.60, 5.59, 5.58, 5.57, 5.56, 5.55, 5.54, 5.53, 5.52, 5.51, 5.50, 5.49, 5.48, 5.47, 5.46, 5.45, 5.44, 5.43, 5.42, 5.41, 5.40, 5.39, 5.38, 5.37, 5.36, 5.35, 5.34, 5.33, 5.32, 5.31, 5.30, 5.29, 5.28, 5.27, 5.26, 5.25, 5.24, 5.23, 5.22, 5.21, 5.20, 5.19, 5.18, 5.17, 5.16, 5.15, 5.14, 5.13, 5.12, 5.11, 5.10, 5.09, 5.08, 5.07, 5.06, 5.05, 5.04, 5.03, 5.02, 5.01, 5.00, 4.99, 4.98, 4.97, 4.96, 4.95, 4.94, 4.93, 4.92, 4.91, 4.90, 4.89, 4.88, 4.87, 4.86, 4.85, 4.84, 4.83, 4.82, 4.81, 4.80, 4.79, 4.78, 4.77, 4.76, 4.75, 4.74, 4.73, 4.72, 4.71, 4.70, 4.69, 4.68, 4.67, 4.66, 4.65, 4.64, 4.63, 4.62, 4.61, 4.60, 4.59, 4.58, 4.57, 4.56, 4.55, 4.54, 4.53, 4.52, 4.51, 4.50, 4.49, 4.48, 4.47, 4.46, 4.45, 4.44, 4.43, 4.42, 4.41, 4.40, 4.39, 4.38, 4.37, 4.36, 4.35, 4.34, 4.33, 4.32, 4.31, 4.30, 4.29, 4.28, 4.27, 4.26, 4.25, 4.24, 4.23, 4.22, 4.21, 4.20, 4.19, 4.18, 4.17, 4.16, 4.15, 4.14, 4.13, 4.12, 4.11, 4.10, 4.09, 4.08, 4.07, 4.06, 4.05, 4.04, 4.03, 4.02, 4.01, 4.00, 3.99, 3.98, 3.97, 3.96, 3.95, 3.94, 3.93, 3.92, 3.91, 3.90, 3.89, 3.88, 3.87, 3.86, 3.85, 3.84, 3.83, 3.82, 3.81, 3.80, 3.79, 3.78, 3.77, 3.76, 3.75, 3.74, 3.73, 3.72, 3.71, 3.70, 3.69, 3.68, 3.67, 3.66, 3.65, 3.64, 3.63, 3.62, 3.61, 3.60, 3.59, 3.58, 3.57, 3.56, 3.55, 3.54, 3.53, 3.52, 3.51, 3.50, 3.49, 3.48, 3.47, 3.46, 3.45, 3.44, 3.43, 3.42, 3.41, 3.40, 3.39, 3.38, 3.37, 3.36, 3.35, 3.34, 3.33, 3.32, 3.31, 3.30, 3.29, 3.28, 3.27, 3.26, 3.25, 3.24, 3.23, 3.22, 3.21, 3.20, 3.19, 3.18, 3.17, 3.16, 3.15, 3.14, 3.13, 3.12, 3.11, 3.10, 3.09, 3.08, 3.07, 3.06, 3.05, 3.04, 3.03, 3.02, 3.01, 3.00, 2.99, 2.98, 2.97, 2.96, 2.95, 2.94, 2.93, 2.92, 2.91, 2.90, 2.89, 2.88, 2.87, 2.86, 2.85, 2.84, 2.83, 2.82, 2.81, 2.80, 2.79, 2.78, 2.77, 2.76, 2.75, 2.74, 2.73, 2.72, 2.71, 2.70, 2.69, 2.68, 2.67, 2.66, 2.65, 2.64, 2.63, 2.62, 2.61, 2.60, 2.59, 2.58, 2.57, 2.56, 2.55, 2.54, 2.53, 2.52, 2.51, 2.50, 2.49, 2.48, 2.47, 2.46, 2.45, 2.44, 2.43, 2.42, 2.41, 2.40, 2.39, 2.38, 2.37, 2.36, 2.35, 2.34, 2.33, 2.32, 2.31, 2.30, 2.29, 2.28, 2.27, 2.26, 2.25, 2.24, 2.23, 2.22, 2.21, 2.20, 2.19, 2.18, 2.17, 2.16, 2.15, 2.14, 2.13, 2.12, 2.11, 2.10, 2.09, 2.08, 2.07, 2.06, 2.05, 2.04, 2.03, 2.02, 2.01, 2.00, 1.99, 1.98, 1.97, 1.96, 1.95, 1.94, 1.93, 1.92, 1.91, 1.90, 1.89, 1.88, 1.87, 1.86, 1.85, 1.84, 1.83, 1.82, 1.81, 1.80, 1.79, 1.78, 1.77, 1.76, 1.75, 1.74, 1.73, 1.72, 1.71, 1.70, 1.69, 1.68, 1.67, 1.66, 1.65, 1.64, 1.63, 1.62, 1.61, 1.60, 1.59, 1.58, 1.57, 1.56, 1.55, 1.54, 1.53, 1.52, 1.51, 1.50, 1.49, 1.48, 1.47, 1.46, 1.45, 1.44, 1.43, 1.42, 1.41, 1.40, 1.39, 1.38, 1.37, 1.36, 1.35, 1.34, 1.33, 1.32, 1.31, 1.30, 1.29, 1.28, 1.27, 1.26, 1.25, 1.24, 1.23, 1.22, 1.21, 1.20, 1.19, 1.18, 1.17, 1.16, 1.15, 1.14, 1.13, 1.12, 1.11, 1.10, 1.09, 1.08, 1.07, 1.06, 1.05, 1.04, 1.03, 1.02, 1.01, 1.00, 0.99, 0.98, 0.97, 0.96, 0.95, 0.94, 0.93, 0.92, 0.91, 0.90, 0.89, 0.88, 0.87, 0.86, 0.85, 0.84, 0.83, 0.82, 0.81, 0.80, 0.79, 0.7

Figure S20.  $^{13}\text{C}$ -NMR spectrum of compound 17

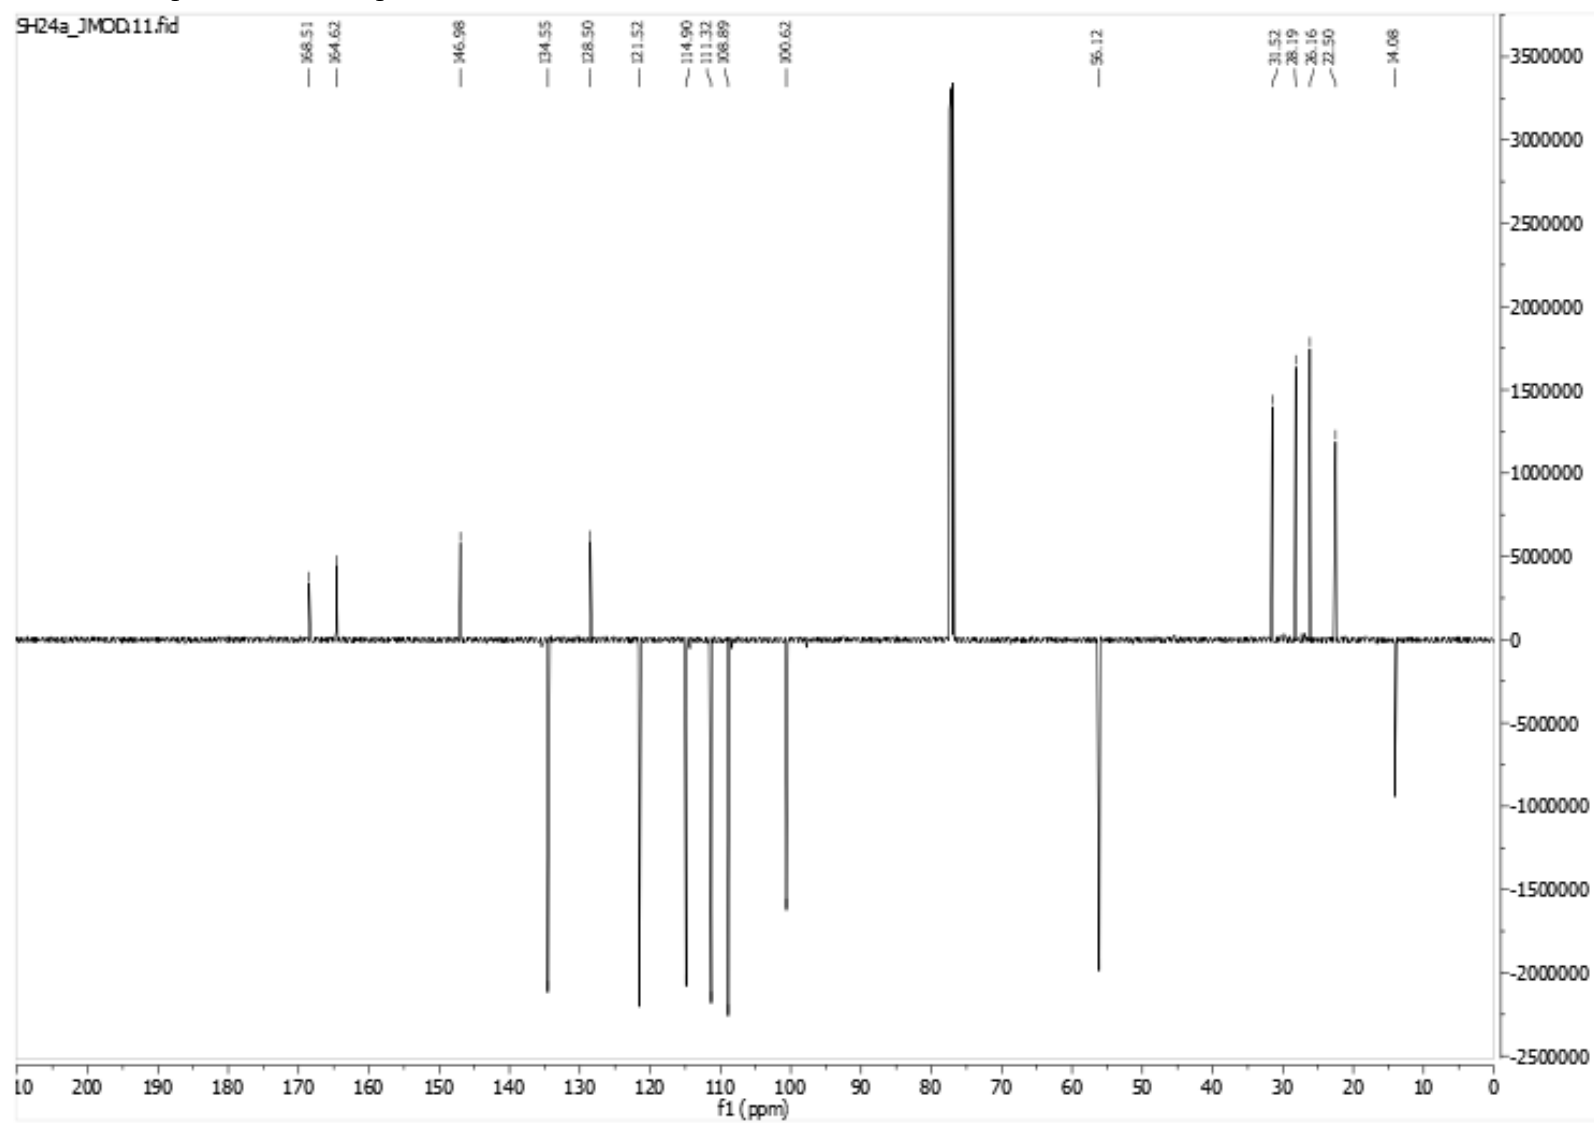

Figure S21.  $^1\text{H}$ -NMR spectrum of compound 18

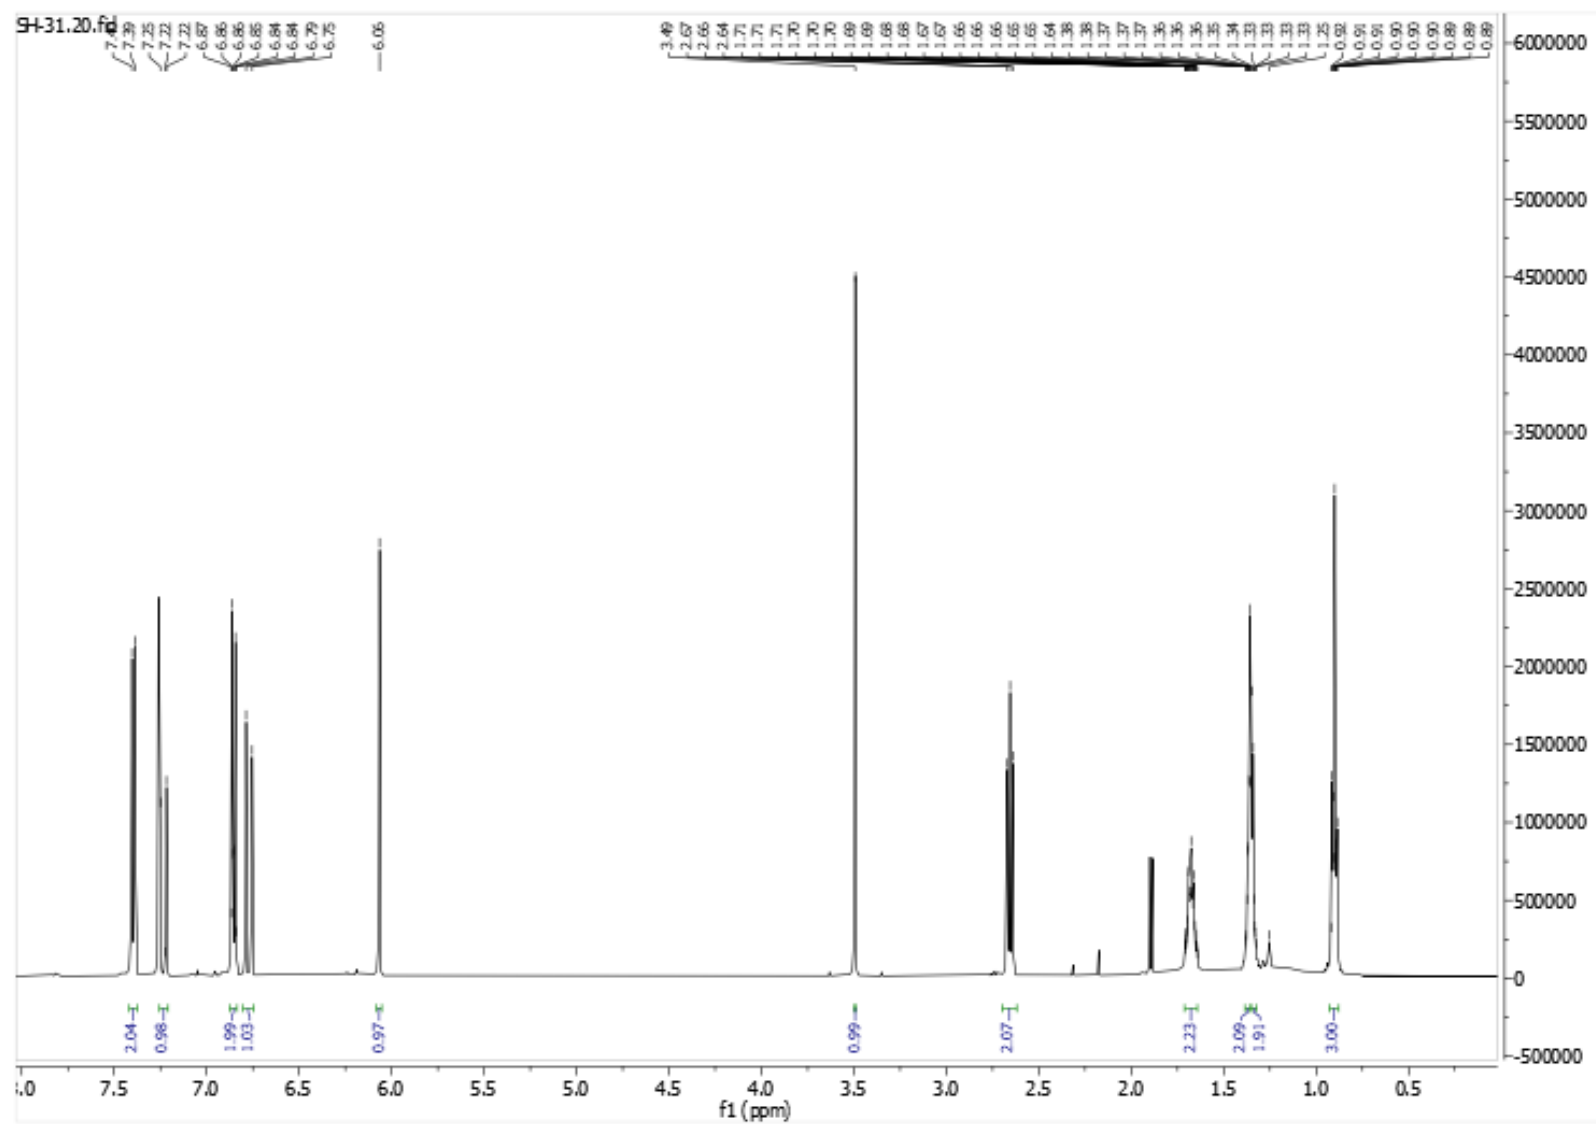

Figure S22.  $^{13}\text{C}$ -NMR spectrum of compound 18

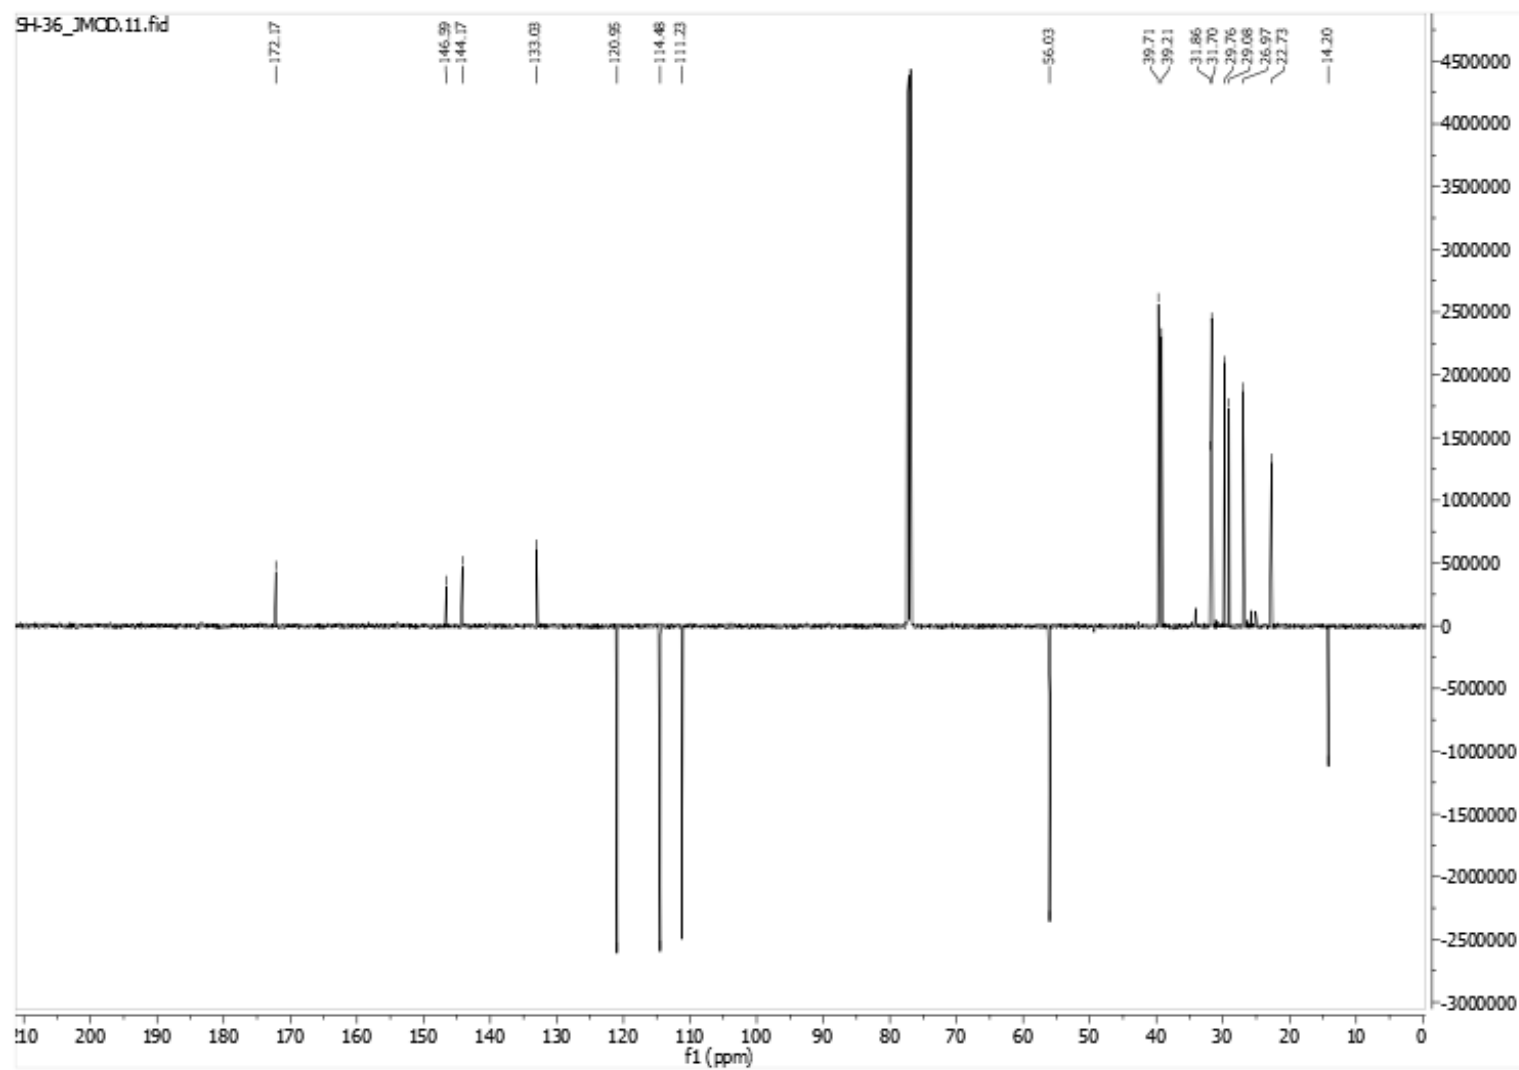



Figure S23.  $^1\text{H}$ -NMR spectrum of compound 22

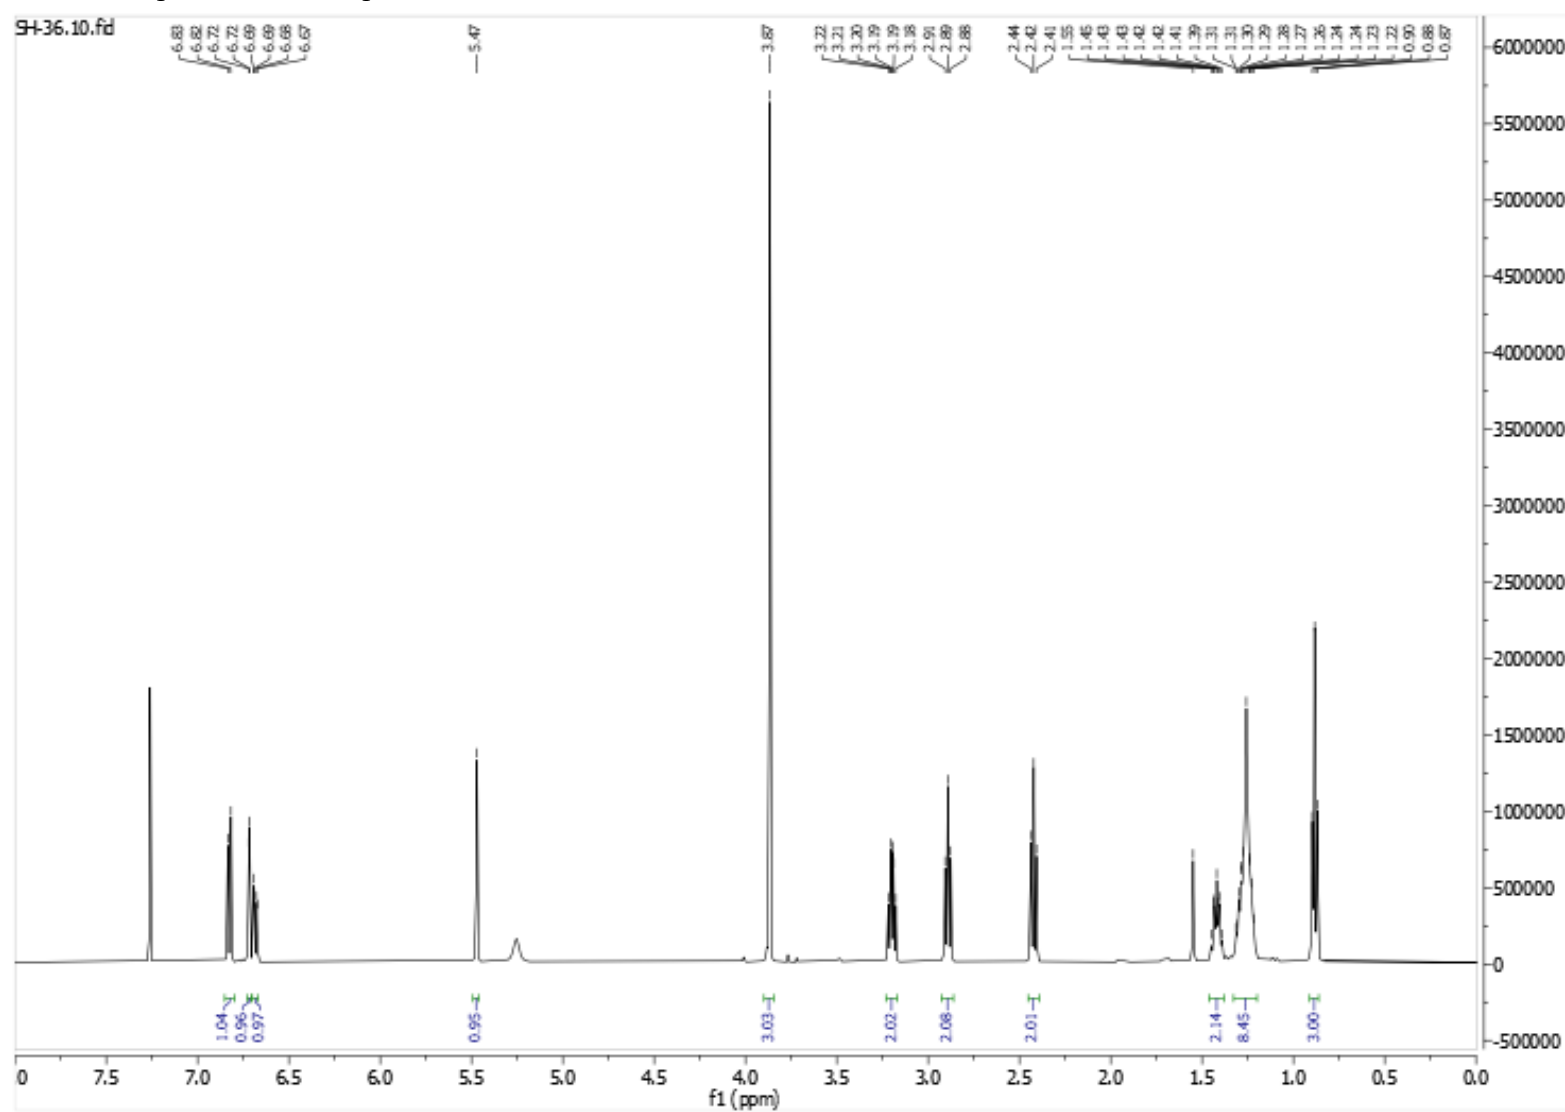

Figure S24.  $^{13}\text{C}$ -NMR spectrum of compound 22

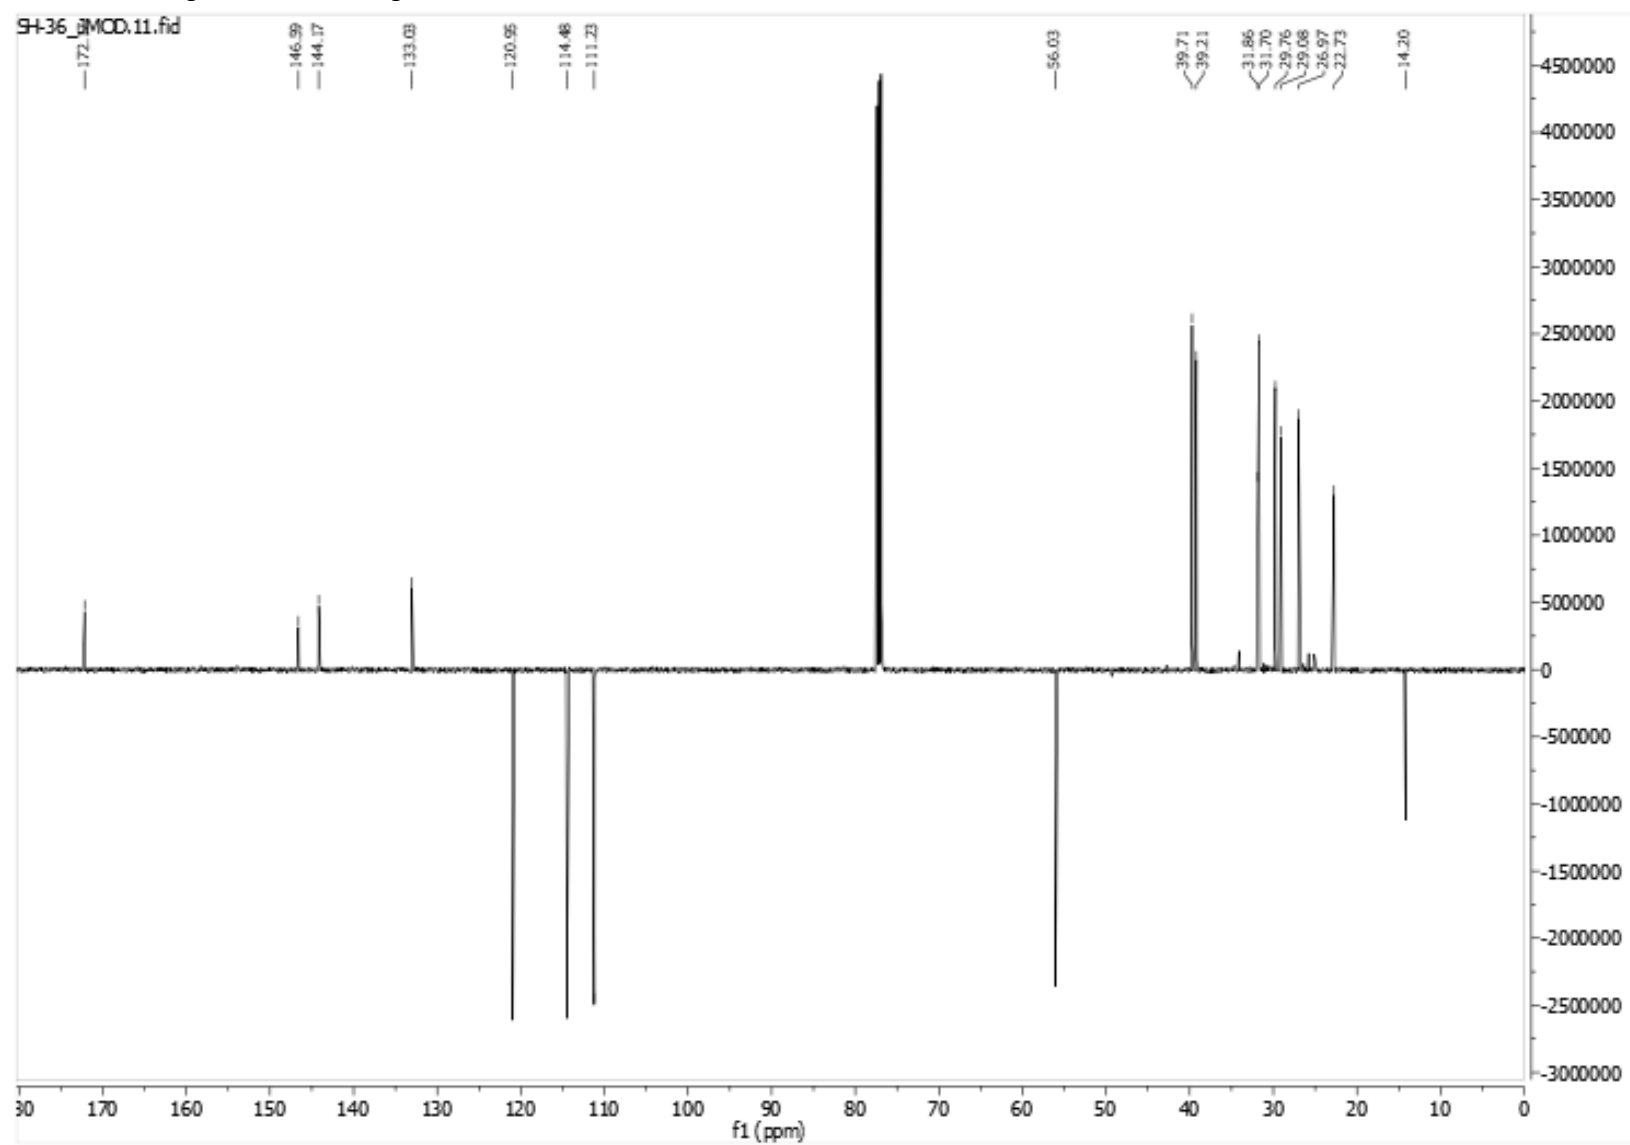

**Figure S25.** Correlation between the antiplatelet and COX-1 inhibitory activities of the tested compounds. Compounds inactive ( $IC_{50} > 100 \mu M$  on either bioassay, i.e., **12**, **15**, **18**, and **22**) are not included but they fit in the general trend.

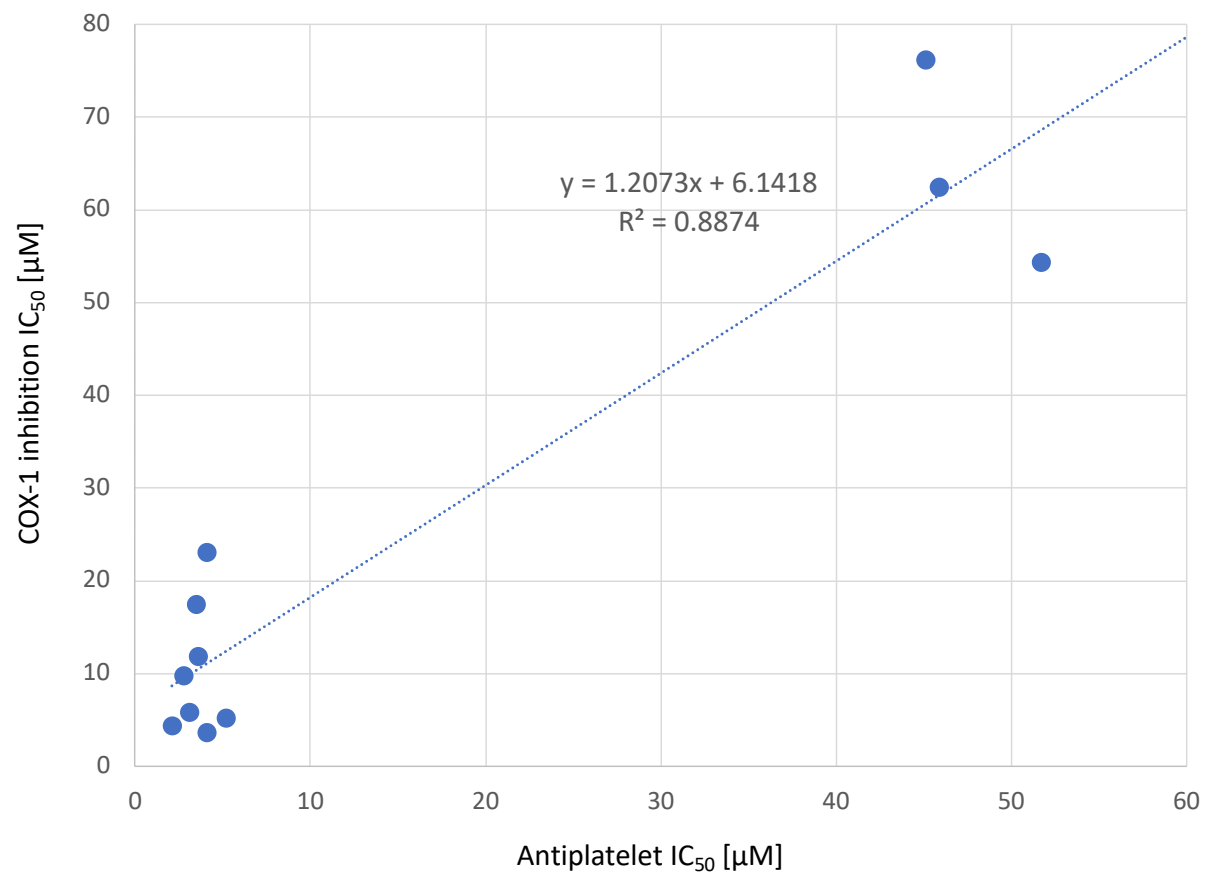

**Table S1.** Docking results obtained using AutoDockTools 1.5.7 and Discovery Studio visualizer (21.1.0.20298)

| Compound | Binding energy (Kcal/mole) | Number of interacting AA | Number of conventional H-bonds | AA involved in H-bonds          |
|----------|----------------------------|--------------------------|--------------------------------|---------------------------------|
| 1        | -8.68                      | 9                        | 2                              | Val A:349, Ser A:530            |
| 2        | -8.76                      | 6                        | -                              | -                               |
| 3        | -8.50                      | 9                        | 1                              | Ile A:523                       |
| 4        | -8.38                      | 11                       | 1                              | Ser A:530                       |
| 5        | -8.01                      | 11                       | 1                              | Tyr A:355                       |
| 6        | -7.70                      | 8                        | 2                              | Val A:349, Ser A:530            |
| 11A      | -9.29                      | 9                        | -                              | -                               |
| 11B      | -8.93                      | 9                        | 1                              | Tyr A:385                       |
| 11C      | -8.21                      | 4                        | -                              | -                               |
| 12A      | -9.23                      | 6                        | 3                              | Tyr A:385, Gly A:533, ASN A:375 |
| 12B      | -8.76                      | 5                        | 1                              | GLY A:533                       |
| 12C      | -8.22                      | 5                        | 1                              | ASN A:375                       |
| 13A      | -8.30                      | 7                        | 1                              | Arg A:120                       |
| 13B      | -9.20                      | 9                        | 1                              | ASN A:375                       |
| 13C      | -8.85                      | 11                       | -                              | -                               |
| 14       | -8.88                      | 10                       | -                              | -                               |
| 15       | -8.36                      | 9                        | 1                              | Met A:522                       |
| 16       | -8.47                      | 8                        | 1                              | Gly A:533                       |
| 17       | -9.50                      | 9                        | -                              | -                               |
| 18       | -9.32                      | 12                       | 1                              | Arg A:376                       |
| 22       | -8.54                      | 10                       | 2                              | Tyr A:385, Ile A:523            |
